# Supplementary material for: In Australasia, gender is still on the agenda in geosciences
Source: Copernicus journal article supplement (doi:10.5194/adgeo-53-205-2020), 2020-09-24
Supplement: Supplementary file 1 [file adgeo-53-205-2020-supplement.zip]

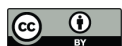

## *Supplement of*

# **In Australasia, gender is still on the agenda in geosciences**

**Heather K. Handley et al.**

*Correspondence to:* Heather Handley ([heather.handley@mq.edu.au](mailto:heather.handley@mq.edu.au))

- [adgeo-53-205-2020-supplement-title-page.pdf](#)
- [Table S1.xlsx](#)
- [Table S2.xlsx](#)
- [Table S3.xlsx](#)
- [Table S4.xlsx](#)
- [\\_\\_MACOSX](#)
  - [.\\_Table S1.xlsx](#)
  - [.\\_Table S2.xlsx](#)
  - [.\\_Table S3.xlsx](#)
  - [.\\_Table S4.xlsx](#)

The copyright of individual parts of the supplement might differ from the CC BY 4.0 License.
