# Supplementary material for: In Australasia, gender is still on the agenda in geosciences
Source: Copernicus journal article supplement (doi:10.5194/adgeo-53-205-2020), 2020-09-24
Supplement: Supplementary file 1 [file Table S1.xlsx]

## Sheet: Table S1
	Table S1. Gender balance by employment level in geoscience or a related Department, Institution or School as indicated by headcount in selected Australasian Universities
	Australia
	University Name	Australian Rank: QS/Times	University World Ranking: QS/Times	Disciplines of School/Dept considered	Present Head of School/Dept: Male/Female	Total academic staff (Level A to Level E)	Overall total staff percentage of women	Overall total staff percentage of men	Female Associate Lecturer (Level A)	# Female Lecturer (Level B)	# Female Senior Lecturer (Level C)	# Female Associate Prof. (Level D)	# Female Prof. (Level E)	Male Postdoc (Level A)	# Male Lecturer (Level B)	# Male Senior Lecturer (Level C)	# Male Associate Prof. (Level D)	# Male Prof. (Level E)	Date of Data Collection	Link to Webpage
	Australian National University	1/2	29/49	Earth Sciences	Male	67	0.313433	0.686567	9	7	0	2	3	7	11	7	3	18	2020-05-25	http://rses.anu.edu.au/people/academics
	University of Melbourne	2/1	38/32	Earth Sciences (includes atmospheric sciences, environmental sciences and geosciences)	Male	42	0.428571	0.571429	2	11	3	0	2	1	8	0	6	9	2020-05-25	https://earthsci.unimelb.edu.au/people/academic-staff
	University of Sydney	3/3	42/59	School of Geosciences (includes geography and environmental science)	Male	44	0.363636	0.636364	3	6	2	3	2	3	4	2	8	11	2020-05-25	https://www.sydney.edu.au/science/schools/school-of-geosciences/academic-staff.html
	University of New South Wales	4/6	43/96	School of Biological, Earth and Environmental Sciences (biology staff excluded)	Male	109	0.394495	0.605505	10	14	6	5	8	12	9	13	11	21	2020-05-25	https://www.bees.unsw.edu.au/directory
	University of Queensland	5/4	47/69	Earth and Environmental Sciences	Male	100	0.41	0.59	19	6	8	6	2	18	13	8	8	12	21/1/2020	https://sees.uq.edu.au/
	Monash University	6/5	58/84	Earth and Environmental Sciences	Male	58	0.310345	0.689655	3	9	5	1	0	0	21	4	4	11	2020-05-25	https://www.monash.edu/science/schools/earth-atmosphere-environment/our-people
	University of Western Australia	7/7	86/154	Earth Sciences	Female	37	0.243243	0.756757	0	4	3	1	1	4	9	5	4	6	2020-05-25	https://directory.uwa.edu.au/view?dn=ou%3DSchool%20of%20Earth%20Sciences%2Cou%3DFaculty%20of%20Science%2Cou%3DFaculties%2Co%3DThe%20University%20of%20Western%20Australia
	University of Adelaide	8/8	106/135	School of Physical Sciences (Earth Sciences) and Australian School of Petroleum within School of Engineering	Head of School = Male. Head of Earth Sciences Dept = Female. Head of Australian School of Petroleum = Female	30	0.233333	0.766667	2	0	4	1	0	0	7	5	3	8	2020-05-25	https://sciences.adelaide.edu.au/physical-sciences/people and https://www.adelaide.edu.au/directory/org/Australian%20School%20of%20Petroleum%20&%20Energy%20Resources.html?department=Australian%20School%20of%20Petroleum%20%26%20Energy%20Resources;dsn=directory.phonebook;m=list;page=;perpage=50
	University of Newcastle	10/-	207/-	School of Environmental and Life Scence	Female	31	0.516129	0.483871	2	5	5	3	1	0	1	6	6	2	2020-05-25	https://www.newcastle.edu.au/faculty/science/people
	James Cook University	-/10	-/201-250	Centre for Tropical Environment and Sustainability Science Centre for Tropical Water and Aquatic Ecosystem Research	Both Male	115	0.382609	0.617391	2	15	19	5	3	1	9	28	12	21	21/01/20	https://research.jcu.edu.au/portfolio/list/centres/#centre-TESS
	Macquarie University	-/10	-/201-250	Earth and Environmental Sciences (recently merged Dept. Earth and Planetary Sciences and Dept. Environmental Sciences)	Female	59	0.322034	0.677966	7	2	3	4	3	11	3	8	7	11	2020-05-25	https://www.mq.edu.au/about/about-the-university/faculties-and-departments/faculty-of-science-and-engineering/departments-and-centres/department-of-environmental-sciences/our-people AND https://www.mq.edu.au/about/about-the-university/faculties-and-departments/faculty-of-science-and-engineering/departments-and-centres/department-of-earth-and-planetary-sciences
	Queensland University of Technology	-/10	-/201-250	School of Earth and Atmospheric Sciences School of Biology and Environmental Science	Both Male	51	0.431373	0.568627	3	9	5	3	2	0	3	7	8	11	21/01/20	https://www.qut.edu.au/science-engineering/schools/biology-environmental-science https://www.qut.edu.au/science-engineering/schools/earth-atmospheric-sciences
	University of Wollongong	-/10	201-250	Earth, Environmental and Atmospheric Sciences	Male	44	0.318182	0.681818	1	3	3	3	4	0	7	8	7	8	2020-03-02	https://www.uow.edu.au/science-medicine-health/schools-entities/school-of-earth-atmospheric-and-life-sciences/
	Australia Total					787	0.365947	0.634053	63	91	66	37	31	57	105	101	87	149
	Data on university rankings taken from https://www.universityrankings.com.au/qs-australian-rankings.html and https://www.universityrankings.com.au/the-times-australian-rankings.html
	The University Technology Sydney (Australia University Ranking: QS = 9/Times = 9 and International University Ranking: QS = 140, Times = 196) was excluded due to the lack of visible staff that specialise in geosciences
	The University of South Australia was excluded as hosts very few geosciencce staff that are distributed in number of different dept./institutes.
	New Zealand
	University Name	New Zealand Rank QS/Times	University World Ranking QS/Times	Disciplines of School/Dept considered	Present Head of School/Dept: Male/Female	Total academic staff (Level A to Level E)	Overall total staff percentage of women	Overall total staff percentage of men	Female Postdoc (Level A)	# Female Lecturer (Level B)	# Female Senior Lecturer (Level C)	# Female Associate Prof. (Level D)	# Female Prof. (Level E)	Male Postdoc (Level A)	# Male Lecturer (Level B)	# Male Senior Lecturer (Level C)	# Male Associate Prof. (Level D)	# Male Prof. (Level E)	Date of Data Collection	Link to Webpage
	University of Auckland	1/1	88/179	School of Environment	Female	62	0.387097	0.612903	5	5	8	5	1	4	6	9	11	8	24/12/2019	http://www.science.auckland.ac.nz/people/search#?search=environment&page=1&rows=20&category=staff&orderBy=lastname
	University of Otago	2/2	176/201-250	Geology	Male	23	0.391304	0.608696	7	0	2	0	0	3	1	4	2	4	24/12/2019	https://www.otago.ac.nz/geology/staff/index.html
	Victoria University of Wellington	5/5	215/501-600	Geography, Earth and Environmental Science	Male	44	0.386364	0.613636	4	6	4	0	3	4	4	4	4	11	24/12/2019	https://www.wgtn.ac.nz/sgees/about/staff
	University of Canterbury	4/4	227/301-350	Earth and Environment	Female (acting head)	43	0.348837	0.651163	0	6	8	1	0	4	4	7	7	6	24/12/2019	https://www.canterbury.ac.nz/science/schools-and-departments/earth-and-environment/contact-us/
	University of Waikato	5/5	266/501-600	Earth Science	Male	22	0.318182	0.681818	0	3	3	0	1	5	0	3	2	5	24/12/2019	https://sci.waikato.ac.nz/about-us/school-of-science/earth-sciences/our-people/staff
	Massey University	5/5	287/501-600	Geology	Male	19	0.263158	0.736842	1	1	2	0	1	0	1	3	4	6	24/12/2019	https://www.massey.ac.nz/massey/explore/research/geology/geology_home.cfm
	New Zealand Total					213	0.361502	0.638498	17	21	27	6	6	20	16	30	30	40
	Lincoln University and Auckland University of Technology were excluded from data collection
	https://www.timeshighereducation.com/world-university-rankings/2020/world-ranking#!/page/0/length/25/locations/NZ/sort_by/rank/sort_order/asc/cols/stats
	https://www.topuniversities.com/universities/country/new-zealand
	Other Australasian Universities
	University Name		University World Ranking QS/Times	Disciplines of School/Dept considered	Present Head of School/Dept: Male/Female	Total academic staff (Level A to Level E)	Overall total staff percentage of women	Overall total staff percentage of men	Female Postdoc (Level A)	# Female Lecturer (Level B)	# Female Senior Lecturer (Level C)	# Female Associate Prof. (Level D)	# Female Prof. (Level E)	Male Postdoc (Level A)	# Male Lecturer (Level B)	# Male Senior Lecturer (Level C)	# Male Associate Prof. (Level D)	# Male Prof. (Level E)	Date of Data Collection	Link to Webpage
	University of Papua New Guinea		N/A	Earth Sciences, Environmental Sciences and Geography	Male	31	0.290323	0.709677	8	0	1	0	0	12	1	4	2	3	2020-04-02	http://www.upng.ac.pg/site/schools/snps.html
	University of the South Pacific		N/A	Geography, Earth Science and Environment	Male	11	0.181818	0.818182	1	1	0	0	0	0	5	2	2	0	2020-05-25	https://www.usp.ac.fj/index.php?id=21647
