# Supplementary material for: In Australasia, gender is still on the agenda in geosciences
Source: Copernicus journal article supplement (doi:10.5194/adgeo-53-205-2020), 2020-09-24
Supplement: Supplementary file 2 [file Table S2.xlsx]

## Sheet: Table S2
	Table S2. Gender distribution within the Geological Society of Australia (GSA)
	GSA Membership	Female	Male	Other	Total	Percentage female	Percentage male
	2018 (May)	292	1233	n/a	1525	19.1475	80.8525
	2019 (August)	392	1295	2	1689	23.209	76.6726
	GSA Membership by Division (May 2018)	Female	Male	Other	Total	Percentage female	Percentage male
	WA	62	292	n/a	354	17.5141	82.4859
	VIC	38	145	n/a	183	20.765	79.235
	TAS	24	63	n/a	87	27.5862	72.4138
	SA	24	105	n/a	129	18.6047	81.3953
	QLD	38	206	n/a	244	15.5738	84.4262
	NT	9	10	n/a	19	47.3684	52.6316
	NSW	65	273	n/a	338	19.2308	80.7692
	ACT	28	91	n/a	119	23.5294	76.4706
	Total GSA Divisional Member Gender Balance	93	364	n/a	457	20.3501	79.6499
	GSA Divisional Committees (current, 2019-2020)	Female	Male	Other	Total	Percentage female	Percentage male
	WA	4	11	n/a	15	26.6667	73.3333
	VIC	8	4	n/a	12	66.6667	33.3333
	TAS	6	8	n/a	14	42.8571	57.1429
	SA	7	9	n/a	16	43.75	56.25
	QLD	3	16	n/a	19	15.7895	84.2105
	NT	4	0	n/a	4	100	0
	NSW	6	3	n/a	9	66.6667	33.3333
	ACT	4	4	n/a	8	50	50
	Total GSA Divisional Committee Gender Balance	10	7	n/a	17	58.8235	41.1765
	GSA Specialist Groups committee members (current, 2019-2020)	Female	Male	Other	Total	Percentage female	Percentage male
	Australasian Palaeontologists (AAP)	1	3	n/a	4	25	75
	Australian Regolith Geoscientists Alliance (ARGA)	3	3	n/a	6	50	50
	Australasian Sedimentologists Group (ASG)	2	2	n/a	4	50	50
	Coal Geology Group (CGG)	2	6	n/a	8	25	75
	Earth Sciences History Group (ESHG)	0	5	n/a	5	0	100
	Specialist Group in Economic Geology (SGEG)	4	9	n/a	13	30.7692	69.2308
	Environmental Engineering & Hydrogeology Specialist Group (EEHSG)	1	2	n/a	3	33.3333	66.6667
	Specialist Group in Geological Education (SGE)	0	1	n/a	1	0	100
	Specialist Group in Geochemistry, Mineralogy & Petrology (SGGMP)	0	5	n/a	5	0	100
	Specialist Group in Planetary Geoscience	0	2	n/a	2	0	100
	Specialist Group in Solid Earth Geophysics (SGSEG)	1	6	n/a	7	14.2857	85.7143
	Specialist Group in Tectonics and Structural Geology (SGTSG)	5	7	n/a	12	41.6667	58.3333
	Specialist Group in Volcanology (LAVA)	3	2	n/a	5	60	40
	Total	22	53	0	75	29.3333	70.6667
