# Supplementary material for: In Australasia, gender is still on the agenda in geosciences
Source: Copernicus journal article supplement (doi:10.5194/adgeo-53-205-2020), 2020-09-24
Supplement: Supplementary file 3 [file Table S3.xlsx]

## Sheet: Table S3
	Table S3. Gender balance in past national-level/general awards presented by the Geological Society of Australia and Geoscience Society of New Zealand
	Geological Society of Austraia (GSA)
	Name of award	Gender of award (if applicable)	Scope of award	Frequency of award	Year of award	No. of female awardees	No. of male awardees
	W. R. Browne Award	Male	Person distinguished for contributions to the geological sciences in Australia	Biannual	1992	0	1
					1994	0	1
					1996	0	1
					1998	0	1
					2000	0	1
					2002	1	0
					2004	0	1
					2006	0	1
					2008	0	1
					2010	0	1
					2012	0	1
					2014	0	1
					2016	0	1
					2018	0	1
	Subtotal					1	13
	S.W. Carey Award	Male	Person distinguished in the field of tectonics (sensu lato)	Biannual	1992	0	1
					1994	0	1
					1996	0	1
					1998	0	1
					2000	0	1
					2002	0	0
					2004	0	1
					2006	-	-
					2008	0	1
					2010	0	1
					2012	0	1
					2014	0	1
					2016	0	1
					2018	0	1
	Subtotal					0	12
	Joe Harms Medal	Male	Person distinguished for excellence in mineral exploration and contribution to the discovery of ore deposits	Biannual	1994	0	1
					1996	0	1
					1998	0	1
					2000	-	-
					2002	0	2
					2004	0	3
					2006	-	-
					2008	0	1
					2010	0	1
					2012	0	1
					2014	-	-
					2016	0	1
					2018	0	1
	Subtotal					0	13
	E.S. Hills Medal	Male	To a young (<40 years) Australian resident for outstanding contribution(s) to any branch of the geological sciences, anywhere	Biannual	2010	0	1
					2012	0	1
					2014	-	-
					2016	1	0
					2018	0	1
	Subtotal					1	3
	A.E. Ringwood Medal	Male	To a person who has made exceptional research advances in the knowledge of fundamental Earth processes, especially through studies involving petrology and geochemistry and who is recognized internationally for the stature of that contribution	Biannual	2010	0	1
					2012	0	1
					2014	-	-
					2016	0	1
					2018	0	1
	Subtotal					0	4
	Total headcount GSA National Awards					2	45
	Geoscience Society of New Zealand (GSNZ)
	Name of award	Gender of award (if applicable)	Scope of award	Frequency of award	Year of award	No. of female awardees	No. of male awardees
	Harold Wellman	Male	The Prize shall be awarded in recognition of recent discovery of important fossil material within New Zealand. Each rewarded fossil discovery must have been recorded in the New Zealand Fossil Record File.	Annual	1989	0	1
					1990	0	1
					1991	0	1
					1992	0	1
					1993	0	1
					1994	0	1
					1995	0	1
					1996	0	1
					1997	0	1
					1998	0	1
					1999	0	1
					2000	1	0
					2001	0	1
					2002	0	1
					2003	1	0
					2004		1
					2005	1	0
					2006	-	-
					2007	0	1
					2008	0	1
					2009	0	1
					2010	0	1
					2011	0	1
					2012	0	1
					2012	0	1
					2013	0	1
					2014	0	1
					2014	0	1
					2014	0	1
					2016	1	0
					2017	0	1
					2018	1	0
					2019	0	1
	Subtotal					5	27
	NZ Geophysics Award		The prize shall be awarded to the author or authors of the most meritorious eligible publication in the field of geophysics in the current or previous two calendar years.	Annual	1968	0	1
					1969	0	1
					1970	-	-
					1971	0	1
					1972	-	-
					1973	0	1
					1974	0	1
					1975	0	1
					1976	0	1
					1977	-	-
					1978	0	1
					1979	0	1
					1980	0	1
					1981	0	1
					1982	-	-
					1983	0	1
					1984	-	-
					1985	0	1
					1986	0	1
					1987	0	1
					1988	0	1
					1989	0	1
					1990	0	1
					1991	0	1
					1992	0	1
					1993	0	1
					1994	-	-
					1995	0	1
					1996	0	1
					1997	0	1
					1998	0	1
					1999	0	1
					2000	0	1
					2001	0	1
					2002	0	1
					2003	-	-
					2004	0	1
					2005	1	0
					2006	0	1
					2007	0	1
					2008	0	1
					2009	0	1
					2010	0	1
					2011	0	1
					2012	0	1
					2013	0	1
					2014	0	1
					2015	0	1
					2016	1	0
					2017	0	1
					2018	0	1
					2019	1	0
	Subtotal					3	28
	Kingma Award	Male	The award shall be made to the outstanding New Zealand Earth science technician of that year. Eligibility shall be restricted to technicians employed in New Zealand in the field of earth sciences who have been employed in that field for at least 2 years, who have shown marked ability in their field of employment and who have made a notable contribution to the work of their institution, field team…	Annual	1975	0	1
					1976	1	0
					1977	0	1
					1978	0	1
					1979	0	1
					1980	0	1
					1981	0	1
					1982	0	1
					1982	0	1
					1983	0	1
					1984	1	0
					1985	0	1
					1986	0	1
					1987	0	1
					1988	1	0
					1989	0	1
					1990	0	1
					1991	0	1
					1992	0	1
					1993	-	-
					1994	0	1
					1995	0	1
					1996	0	1
					1997	0	1
					1998	0	1
					1999	1	0
					2000	0	1
					2001	0	1
					2002	1	0
					2003	0	1
					2004	0	1
					2005	0	1
					2006	0	1
					2007	0	1
					2008	0	1
					2009	0	1
					2010	0	1
					2011	1	0
					2012	1	0
					2013	1	0
					2014	1	0
					2015	1	0
					2016	0	1
					2017	1	0
					2018	1	0
					2019	0	1
	Subtotal					10	22
	Hochstetter Lecture	Male	This prize commemorates Harold Wellman as an outstanding discoverer of New Zealand fossils and his appreciation of the important role of fossil evidence in the resolution of New Zealand geology. The Prize shall be awarded in recognition of recent discovery of important fossil material within New Zealand. Each rewarded fossil discovery must have been recorded in the New Zealand Fossil Record File.	Annual	1974	0	1
					1975	0	1
					1976	0	1
					1977	0	1
					1978	0	1
					1979	0	1
					1980	0	1
					1981	0	1
					1982	0	1
					1983	0	1
					1984	0	1
					1985	0	1
					1986	0	1
					1987	0	1
					1988	0	1
					1989	1	0
					1990	0	1
					1991	0	1
					1992	0	1
					1993	0	1
					1994	0	1
					1995	0	1
					1996	0	1
					1997	0	1
					1998	0	1
					1999	0	1
					2000	0	1
					2001	0	1
					2002	0	1
					2003	0	1
					2004	0	1
					2005	0	1
					2006	0	1
					2007	0	1
					2008	0	1
					2009	1	0
					2010	0	1
					2011	0	1
					2012	0	1
					2013	0	1
					2014	0	1
					2015	0	1
					2016	0	1
					2017	0	1
					2018	0	1
					2019	1	0
	Subtotal					3	30
	McKay Hammer	Male	The award shall be made to the author(s) of the most meritorious New Zealand contribution to Geoscience published in the previous three calendar years. For the purpose of the award, "a New Zealand contribution" is any contribution by a New Zealand-based author.	Annual	1957	0	1
					1958	0	1
					1959	0	1
					1960	0	1
					1961	0	1
					1962	0	1
					1963	0	1
					1964	0	1
					1965	0	1
					1966	0	1
					1967	0	1
					1968	0	1
					1969	0	1
					1970	0	1
					1971	0	1
					1972	0	1
					1973	0	1
					1974	0	1
					1975	0	1
					1976	0	1
					1977	0	1
					1978	0	1
					1979	0	1
					1980	0	1
					1981	0	1
					1982	0	1
					1983	0	1
					1984	0	1
					1985	0	1
					1986	0	1
					1987	0	1
					1988	0	1
					1989	0	1
					1990	0	1
					1991	0	1
					1992	0	1
					1993	0	1
					1994	0	1
					1995	0	1
					1996	0	1
					1997	0	1
					1998	0	1
					1999	0	1
					2000	0	1
					2001	0	1
					2002	0	1
					2003	0	1
					2004	0	1
					2005	0	1
					2006	0	1
					2007	0	1
					2008	0	1
					2009	0	1
					2010	0	1
					2011	0	1
					2012	0	1
					2013	0	1
					2014	0	1
					2015	1	0
					2016	1	0
					2017	1	0
					2018	1	0
					2019	0	1
	Subtotal					4	29
	Total headcount GSNZ Awards					25	136
	dash (-) denotes where no award was presented that year.
