# Supplementary material for: In Australasia, gender is still on the agenda in geosciences
Source: Copernicus journal article supplement (doi:10.5194/adgeo-53-205-2020), 2020-09-24
Supplement: Supplementary file 4 [file Table S4.xlsx]

## Sheet: Table S4
Table S4. Database of Women in Earth, Environmental and Atmospheric Sciences Australasia at 20th January 2020
First Name	Surname	Email Address	Job title	Organisation	Organisation Type	Group	Country	City	State	Specialisation 1	Specialisation 2	Specialisation 3	Detailed specialisation	Professional website	Personal website	Link to publication list (e.g., google scholar, pure)	Professional social media	Handle	Professional social media	Handle2	Relevant employment opportunities	Conference invitations	Workshop invitations	Committee member opportunitites	Guest speaker opportunities (events, conferences)	Reviewing (topic-relevant)	Examination of higher degree research theses (topic-relevant)	Media - written	Media - radio	Media - television	Mentoring (note only introduced column on 16/08/2019)	Public or school science outreach (note only introduced column on 16/08/2019)	Contact me about these opportunities too
Agathe	Lise-Pronovost	agathe.lise@unimelb.edu.au	McKenzie fellow	University of Melbourne	Academia	School of earth sciences	Australia	Melbourne	Vic	Paleomagnetism	Archaeological Science	Palaeoenvironments				https://scholar.google.com/citations?user=nzTSL6cAAAAJ&hl=en					YES	YES	YES	YES	YES	YES	YES	YES	YES	YES
Ailie	Gallant	ailie.gallant@monash.edu	Senior Lecturer	Monash University	Academia	School of Earth, Atmosphere and Environment	Australia	Melbourne	VIC	Climate science	Drought studies	Climate change	drought, climate data, climate models, climate extremes, climate communication	www.ailiegallant.com		https://scholar.google.com.au/citations?user=l3Mv3fkAAAAJ&hl=en	Twitter	@safaripenguin				YES	YES		YES	YES	YES	YES	YES	YES
Alice	CLEMENT	alice.clement@flinders.edu.au	Research Associate	Flinders University	Academia	College of Science and Engineering	Australia	Adelaide	South Australia	Palaeontology	Biology	Science communication	Vertebrate palaeontology, Devonian, ichthyology, palaeoneurology, evolution	https://www.flinders.edu.au/people/alice.clement	https://draliceclement.com/	https://scholar.google.com.au/citations?user=x-t7hqoAAAAJ&hl=en					YES	YES	YES	YES	YES	YES	YES	YES	YES	YES	YES	YES
Alice	Gorman	Alice.Gorman@flinders.edu.au	Senior Lecturer	Flinders University	Academia	College of Humanities, Arts and Social Sciences	Australia	Adelaide	SA	Archaeological Science	Astrophysics/Astronomy	Science communication	Space archaeology	https://www.flinders.edu.au/people/alice.gorman	http://zoharesque.blogspot.com/	https://scholar.google.com.au/citations?user=0Ehaw8wAAAAJ&hl=en	Twitter	@drspacejunk	LinkedIn		YES	YES	YES	YES	YES			YES	YES	YES
Alison	Troup	a.troup@uq.edu.au	Geoscientist and PhD candidate	Geological Survey of Queensmand and UQ		School of Earth and Environmental Science	Australia	Brisbane	Queensland	Sedimentology	Palaeoenvironments		Petroleum geoscience, organic geochemistry, electrofacies,	https://www.linkedin.com/in/alison-troup			Twitter	@alisontroup			YES	YES	YES	YES	YES	YES
Alysha	Jones	ajon202@aucklanduni.ac.nz	Student	University of Auckland	Academia	School of Environment	New Zealand	Auckland		Palaeoenvironments	Marine science	GIS									YES	YES	YES	YES	YES	YES	YES
Amy	Steiger	amy.steiger@cardno.com.au	GIS Manager	Cardno		Spatial Science	Australia	Wollongong	NSW	GIS	Data management	Data analytics	GIS, spatial, geography, drones, uav, remotely piloted aircraft	www.cardno.com.au			LinkedIn	https://www.linkedin.com/in/amysteiger/				YES			YES			YES
Ana	Gracanin	ag982@uowmail.edu.au	PhD Candidate	University of Wollongong	Academia	School of Earth, Atmospheric and Life Sciences	Australia	Wollongong	New South Wales	Biology	Conservation	Ecology	Camera trapping, wildlife corridors, small mammals, threatened species, possums, gliders, spotted-tailed quolls,	www.theselfietrap.com	www.facebook.com/teamquoll	http://scholar.google.com.au/citations?user=1HWWWP8AAAAJ&hl=en	Facebook	Team Quoll Illawarra and Southern Highlands	Facebook	The Selfie Trap	YES	YES	YES	YES	YES	YES		YES	YES	YES
Ana	Vila-Concejo	ana.vilaconcejo@sydney.edu.au	Associate Professor	The University of Sydney	Academia	School of Geosciences - Marine Studies Institute	Australia	Sydney	NSW	Coastal Geomorphology	Marine science	Geophysics	beach, estuary, coral reefs, sediment, sand, waves	https://sydney.edu.au/science/people/ana.vilaconcejo.php	https://grgusyd.org/	https://scholar.google.com.au/citations?user=iBSjlk4AAAAJ&hl=en	Twitter	@DrAnaVC	Facebook	https://www.facebook.com/GeocoastalResearchGroup/	YES	YES	YES	YES	YES	YES	YES	YES	YES	YES
Angela	Jones	angela@cowmanstoddart.com.au	Environmental Scientist	Cowman Stoddart Pty Ltd	Industry		Australia	Nowra	NSW	Soil science			On-site wastewater treatment and disposal	www.cowmanstoddart.com.au			LinkedIn					YES	YES			YES						YES
Anna	Haiblen	Anna.Haiblen@ga.gov.au	Hydrogeologist	Geoscience Australia		Groundwater Branch, Geoscience Australia	Australia	Symonston	ACT	Glaciology	Sedimentology	Water resources	Geomorphology, Hydrogeology (it would be great if these options were on the drop down list)								YES	YES	YES	YES	YES	YES		YES	YES	YES
Anna	Petts	annaepetts@gmail.com	Program Coordinator - Characterising South Australia's Cover (Geologist)	Geological Survey of South Australia		Department for Energy and Mining	Australia	Adelaide	South Australia	Minerals industry	Geochemistry		Geology, regolith, critical zone, biogeochemistry				Twitter	anna_chica	LinkedIn	https://www.linkedin.com/in/anna-petts-71400720/	YES	YES	YES			YES	YES	YES	YES	YES
Anna	Wåhlin	anna@gu.se	Professor	University of Gothenburg	Academia		Sweden	Gothenburg		Climate science	Oceanography	Marine science	Antarctica, Southern ocean, physical oceanography				Twitter	@awahlin							YES	YES	YES
Anya	Seward	a.seward@gns.cri.nz	Scientist	GNS Science	Government	Energy and Materials - Geothermal	New Zealand	Taupo		Geophysics			Geothermal heat flow	https://www.gns.cri.nz/who/staff/2401.html		https://scholar.google.co.nz/citations?user=MYpUzCQAAAAJ&hl=en						YES	YES		YES	YES	YES	YES			YES	YES
Anya	Reading	anya.reading@utas.edu.au	Professor of Geophysics	University of Tasmania	Academia	Physics	Australia	Hobart	Tasmania	Geophysics	Seismology	Glaciology	Computational, Inverse Theory, Machine Learning, Data Visualisation	https://www.utas.edu.au/profiles/staff/maths-physics/anya-reading	https://orcid.org/0000-0002-9316-7605/print	https://scholar.google.com/citations?hl=en&pli=1&user=b2x_IzcAAAAJ	Twitter	@dataforwisdom			YES	YES	YES		YES						YES
April	Hudson	april.hudson@simecgfg.com	Approvals Coordinator	Tahmoor Coal		Environmental Sciences	Australia	Tahmoor	NSW	Environmental management											YES	YES	YES
Ashlea N.	Wainwright	ashlea.wainwright@monash.edu	Senior Technical Officer	Monash University	Academia	School of Earth Atmosphere and Environment	Australia	Melbourne	Victoria	Geochemistry	Archean geology and early Earth	Geochronology	Isotope geochemistry			https://scholar.google.com.au/citations?user=3Wg96TQAAAAJ&hl=en	Twitter	A_N_Wainwright				YES	YES	YES	YES	YES	YES	YES	YES	YES
Ashleigh	Fromont	a.fromont@gns.cri.nz	Geohazard Analyst	GNS Science	Government	Department of Data Science and Geohazard Monitoring	New Zealand	Wellington		Natural hazards	Geophysics		Seismology, Active Source Seismology, Tectonics, Geohazards, Geophysical Analysis		http://languageoftheland.weebly.com/		LinkedIn	Ashleigh Fromont	Twitter	@kiwigeologist	YES	YES	YES	YES	YES			YES			YES	YES
Ashley	Whitt	aaw.whitt@gmail.com	PhD Candidate	Deakin University	Academia	School of Life and Environmental Sciences	Australia	Melbourne	Victoria	Ecology	Marine science	Climate change	coastal wetland ecology, citizen science, resource management	www.bluecarbonlab.org	https://www.linkedin.com/in/ashleywhittcoastalecology/	https://www.researchgate.net/profile/Ashley_Whitt	Twitter	@CoastalWhitt			YES		YES	YES	YES				YES				Women in Science, primary school STEM, citizen science
Ayesha	Tulloch	ayesha.tulloch@sydney.edu.au	ARC Research Fellow	University of Sydney	Academia	School of Life and Environmental Sciences	Australia	Sydney	NSW	Conservation	Data management	Environmental management		https://sydney.edu.au/science/people/ayesha.tulloch.php	Ayeshatulloch.wordpress.com	http://scholar.google.com.au/citations?user=3Vh11aYAAAAJ&hl=en	Twitter	ayeshatulloch					YES		YES			YES
Bénédicte	Cenki-Tok	benedicte.cenki-tok@sydney.edu.au	Visiting Researcher	Sydney Uni	Academia	Earthbyte	Australia	Sydney	NSW	Metamorphic petrology	Geochronology	Geodynamics		http://www.gm.univ-montp2.fr/spip.php?rubrique391		http://www.researcherid.com/rid/H-5750-2018	Twitter	Cenki-Tok Bénédicte @CenkiTok			YES	YES	YES	YES	YES	YES	YES	YES	YES	YES
Bethany	Ellis	bethany.ellis@anu.edu.au	PhD Candidate	Australian National University	Academia	Research School of Earth Sciences	Australia	Canberra	ACT	Palaeoenvironments	Climate science	Oceanography	coral palaeoclimatology, tropical climate	http://rses.anu.edu.au/people/students/bethany-ellis		https://scholar.google.co.uk/citations?user=ZifG7IcAAAAJ&hl=en	Twitter	@bethany__ellis	Instagram	@bethany__ellis	YES	YES	YES	YES	YES	YES	YES	YES	YES	YES		YES
Bethany	Hoye	bhoye@uow.edu.au	Lecturer	University of Wollongong	Academia	School of Earth Atmospheric and Life Sciences	Australia	Wollongong	NSW	Ecology	Biology	Data analytics	disease ecology, animal migration, infection, movement, microbe, symbiont	https://scholars.uow.edu.au/display/bethany_hoye		https://scholar.google.com.au/citations?user=A_Tf7g0AAAAJ&hl=en	Twitter	@bethanyhoye			YES	YES	YES	YES	YES	YES	YES	YES	YES	YES
Bonnie	Teece	b.teece@unsw.edu.au	PhD Candidate	UNSW	Academia	Australian Centre For Astrobiology	Australia	Sydney	NSW	Biogeochemistry	Palaeontology	Archean geology and early Earth	biomarkers, astrobiology, hydrocarbons, early life, precambrian, biogenicity, mars	https://www.aca.unsw.edu.au/users/bteece#profile-main	https://astrobonology.wordpress.com/	https://orcid.org/0000-0003-0648-5443	Instagram	astrobonology	LinkedIn	https://www.linkedin.com/in/bonnieteece/	YES	YES	YES	YES	YES	YES		YES	YES	YES		YES
Bree	Morgan	bree.morgan@sydney.edu.au	Lecturer	The University of Sydney	Academia	School of Geosciences	Australia		NSW	Geochemistry	Contamination	Sedimentology				https://scholar.google.com.au/citations?hl=en&user=TlOZflYAAAAJ					YES	YES	YES	YES	YES	YES	YES	YES	YES	YES
Carol	Tadros	Carol.Tadros@ansto.gov.au	Palaeo-Environmental Scientist	ANSTO		Environment Research	Australia	Kirrawee DC	NSW	Palaeoenvironments	Trace element geochemistry	Istotope geochemistry	Stable isotopes, trace elements, speleothems, cave drip hydrology, karst, climate change, palaeoclimate.	https://www.ansto.gov.au/people/dr-carol-tadros		https://www.researchgate.net/profile/Carol_Tadros					YES	YES	YES	YES	YES	YES	YES	YES	YES	YES
Carolina	Castro-Sanguino	c.castrosanguino@aims.gov.au	Marine Ecological Modeller	Australian Institute of Marine Science			Australia	Brisbane	QLD	Marine science	Ecology	Environmental management	coral reefs, population dynamics, climate change, anthropogenic stressors			https://scholar.google.com/citations?hl=en&user=TXCCzcoAAAAJ	LinkedIn				YES	YES	YES	YES	YES	YES
Carolina	Gutiérrez-Chávez	carolgutierrz.mx@gmail.com	PhD student	UNSW	Academia	School of Biotechnology and Biomolecular Sciences	Australia	Sydney	NSW	Geomicrobiology	Soil science	Marine science	Bioactivity, Microbial ecology, natural products				Twitter	Hunting_bugs	Instagram	Hunting_bugs	YES	YES	YES	YES	YES	YES	YES	YES	YES	YES
Caroline	Holden	c.holden@gns.cri.nz	Seismologist	GNS Science	Academia	Seismology	New Zealand	Lower Hutt		Geophysics	Seismology	Engineering geology									YES	YES	YES	YES	YES		YES	YES	YES	YES	YES	YES
Caroline	Poulsen	caroline.poulsen@monash.edu	Senior Lecturer	Monash University	Academia	School of Earth Atmosphere and Environment	Australia	Clayton	Victoria	Remote sensing	Climate science	Atmospheric science	Remote Sensing of the atmosphere, aerosol and clouds	https://research.monash.edu/en/persons/caroline-poulsen			Twitter	@caropoulsen				YES	YES	YES	YES	YES	YES	YES	YES	YES	YES	YES	Potential collaborative opportunities
Caroline	Eakin	caroline.eakin@anu.edu.au	Research Fellow / Lecturer	Australian National University	Academia	Research School of Earth Sciences	Australia	Acton	ACT	Seismology	Geophysics	Geodynamics	seismic anisotropy, mantle dynamics, plate tectonics	http://rses.anu.edu.au/people/academics/dr-caroline-m-eakin		https://scholar.google.co.uk/citations?user=l08SFLAAAAAJ&hl=en	Twitter	@SeismoCaro	Instagram	@SeismoCaro		YES	YES		YES			YES	YES	YES
Casey	Blundell	casey.blundell@monash.edu	PhD Student	Monash University	Academia	School of Earth, Atmosphere and Environment	Australia	Melbourne	Vic	Geophysics	Structural geology		Otago, New Zealand, aeromagnetics, gravity, potential fields				Instagram	@australiangeologist			YES	YES	YES
Cassy	Baxter	cassy.baxter@cardno.com.au	Senior Environmental Scientist/Project Manager	Cardno		Environmental Science	Australia	Wollongong	NSW	Environmental management	Land use	Mining industry	Environmental Impact Assessment	https://www.cardno.com/			LinkedIn	https://www.linkedin.com/in/cassy-baxter-9b87858a/				YES	YES	YES	YES	YES	YES
Catheline	Froehlich	catheline.froehlich@gmail.com	PhD student	University of Wollongong	Academia	School of Earth, Atmospheric, and Life Sciences	Australia			Marine science	Ecology	Climate change	linking behavior, ecology and climate change			https://scholar.google.com.au/citations?user=lem8ckUAAAAJ&hl=en	Twitter	@CathelineFro	LinkedIn	https://www.linkedin.com/in/catheline-froehlich-31901747/	YES	YES	YES	YES	YES	YES	YES	YES	YES	YES
Catherine	Hughes	Cath.Hughes@ansto.gov.au	Senior Research Scientist	ANSTO		Environment Research Theme	Australia	Sydney	New South Wales	Hydrology	Istotope geochemistry	Atmospheric science	Isotope hydrology, radioactive contamination, precipitation isotopes, isoscapes, radioactive tracers,	https://www.ansto.gov.au/people/dr-catherine-hughes	https://www.researchgate.net/profile/Catherine_Hughes4	https://scholar.google.com.au/citations?user=L_qv7rQAAAAJ&hl=en&oi=ao					YES	YES	YES	YES	YES	YES		YES	YES	YES			Collaboration, consultancy
Cecile	Massiot	c.massiot@gns.cri.nz	Geothermal Geoscientist	GNS Science	Crown Research Institute / Geological Survey	Earth Resources and Materials	New Zealand	Lower Hutt	Wellington	Tectonics	Geophysics	Structural geology	geothermal, fracture, stress, fluid flow, borehole geophysics			https://scholar.google.co.nz/citations?user=4FwIuLcAAAAJ&hl=en&oi=ao					YES	YES	YES	YES	YES	YES	YES	YES			YES	YES
Cecily	Arkell	cecily.arkell@csiro.au	Education Officer	Earth Science Western Australia			Australia	Perth	Western Australia	Science communication			Engaging students in primary and secondary schools with hands-on activities, writing teacher resources, preparing STEM resources on real-life Earth science applicationse	www.earthsciencewa.com.au			Facebook	@earthsciencewa	Twitter	@EarthScienceWA		YES	YES		YES			YES	YES	YES			Primary and secondary education resources or other opportunites
Ceren	Ayas	ceren.ayas@climate-energy-college.org	Phd candidate	University of Melbourne	Academia	Climate and Energy College	Australia	Melbourne	Victoria	Climate change	Social science		Coal transitions								YES							YES
Charlotte	Robinson	charlotte.mary.robinson@gmail.com	Research Associate	Curtin University	Academia	School of Earth & Planetary Sciences	Australia	Perth	Western Australia	Oceanography	Remote sensing	Marine science	primary productivity, photosynthesis, ocean optics, bio-optics, satellite remote sensing, phytoplankton	https://staffportal.curtin.edu.au/staff/profile/view/Charlotte.Robinson		https://scholar.google.com.au/citations?user=_eSVUMgAAAAJ&hl=en					YES	YES	YES	YES	YES	YES	YES	YES	YES	YES
Charlotte M	Allen	cm.allen@qut.edu.au	Principal Research Fellow	Queensland Univeristy of Technology	Academia	Institute for Future Environments	Australia	Brisbane	QLD	Geochronology	Geochemistry	Tectonics	what happened to Igneous Petrology? Instrumentation Specialist			google scholar									YES	YES	YES	YES
Christina	Magill	christina@joltanalytics.com	Founder	Jolt Analytics			Australia	Sydney	NSW	Disaster risk	Natural hazards	Volcanology		joltanalytics.com	https://scholar.google.com/citations?user=9oqICCAAAAAJ&hl=en&oi=ao		LinkedIn	https://www.linkedin.com/in/christina-magill/				Yes	Yes		Yes	Yes	Yes	Yes	Yes	Yes			Diversity, Equity, and Inclusion topics
Christina	McGraw	christina.mcgraw@otago.ac.nz	Senior lecturer	University of Otago	Academia	Chemistry	New Zealand	Dunedin		Marine science	Climate change		ocean acidification, marine chemistry, sensors	https://www.otago.ac.nz/chemistry/people/otago669836.html		https://scholar.google.co.nz/citations?user=_0-7hYEAAAAJ&hl=en&oi=ao						YES	YES	YES	YES	YES	YES
Christine	Erbe	c.erbe@curtin.edu.au	Director of CMST; Professor in Earth & Planetary Sci.	Curtin University	Academia	Centre for Marine Science & Technology (CMST)	Australia	Perth	WA	Marine science	Oceanography	Environmental management	marine mammals, bioacoustics, underwater acoustics, underwater noise, noise impacts	https://cmst.curtin.edu.au	https://staffportal.curtin.edu.au/staff/profile/view/C.Erbe/	https://scholar.google.com/citations?user=9DXOXWMAAAAJ&hl=en	Facebook	https://www.facebook.com/CMSTCurtin/			YES	YES	YES	YES	YES			YES				YES
Claire	Mallard	claire.mallard@sydney.edu.au	Postdoctoral fellow	The University of Sydney	Academia	The Earthbyte group	Australia	Sydney	NSW	Geodynamics	Sedimentology	Geophysics	surface process models and virtual planets	https://sydney.edu.au/science/people/claire.mallard.php	https://didthisreallyhappen.net/		Facebook	https://www.facebook.com/didthisreallyhappen/	Facebook	https://www.facebook.com/earthbyte/	YES	YES	YES	YES	YES	YES	YES	YES	YES	YES	YES	YES
Clare	Firth	clare.firth@bhp.com	Specialist Geology- Non Mining Tenure	BHP		Coal Geoscience	Australia	Brisbane	Queensland	Mining industry	GIS	Structural geology	Exploration, coal, Bowen Basin,				LinkedIn	linkedin.com/in/clare-firth-345b588b			YES	YES	YES	YES	YES
Danica	Torres	t.t.danica@gmail.com	GIS Analyst	New Zealand Walking Access Commission		School of Earth Science	New Zealand			GIS							LinkedIn	Danica Torres			YES	YES	YES			YES		YES
Debby	Ng	debby.ng@utas.edu.au		University of Tasmania	Academia	School of Natural Sciences	Australia	GREENSLOPES	Queensland	Conservation	Ecology	Biology	disease ecology				Facebook	https://www.facebook.com/debbyng	Twitter	torvaanser	YES	YES	YES		YES			YES	YES	YES
Deborah	Gardner	dagardne@ucsd.edu	Graduate Student	Scripps Institution of Oceanography at UC San Diego		Climate, Atmospheric Sciences, and Physical Oceanograhy (CASPO)	United States	San Diego	California	Oceanography	Data analytics		ECCO, State Estimate, Ocean Modeling, Budgets, Remote Sensing, Global Ocean Models				Twitter	DebDoesScience	LinkedIn	https://www.linkedin.com/in/deborahagardner/		Yes		Yes	Yes			Yes	Yes	Yes
Diana	King	dianak@uow.edu.au	Research Officer	University of Wollongong	Academia	Global Challenges	Australia	Wollongong	NSW	Ecology	GIS	Remote sensing	Antarctica, vegetation change, image analysis, environmental monitoring	https://scholars.uow.edu.au/display/diana_king		https://scholar.google.com/citations?user=MVyija4AAAAJ&hl=en	LinkedIn	dianaking21	Twitter	@kingdiana21	YES	YES	YES	YES	YES	YES	YES	YES
Diana	Montano	d.montanonavarro@uqconnect.edu.au	Student	UQ		School of Earth and Environmental Sciences	Australia	Brisbane	QLD	Environmental management	Sustainability	Science communication	Water management, fire management				LinkedIn	linkedin.com/in/montanoclarisse			Yes	Yes	Yes	Yes	Yes	Yes		Yes	Yes	Yes
Dominique	Tanner	dtanner@uow.edu.au	Lecturer	University of Wollongong	Academia	School of Earth, Atmospheric & Life Sciences	Australia	Wollongong	NSW	Trace element geochemistry	Science communication	Istotope geochemistry	Petrology, igneous petrology, mineralogy, ore deposit research, economic geology	http://uowvivo.uow.edu.au/individual/dominique_tanner		https://scholar.google.com.au/citations?user=y_L5P7kAAAAJ&hl=en	Twitter	@drdomtanner				YES	YES		YES	YES	YES	YES	YES	YES	YES
Dorrit	Jacob	dorrit.jacob@mq.edu.au	Professor	Macquarie University	Academia	Department of Earth and Planetary Sciences	Australia	Sydney	NSW	Geochemistry	Biogeochemistry		Diamond, Eclogite, trace elements, biomineralization, shells	https://directory.science.mq.edu.au/users/djacob		https://scholar.google.com.au/citations?hl=en&user=3NOtgekAAAAJ	Twitter	@DorritJacob			YES	YES	YES		YES
Eleanor	Green	eleanor.green@unimelb.edu.au	senior lecturer	University of Melbourne	Academia	School of Earth Sciences	Australia	Melbourne	VIC	Geochemistry	Metamorphic petrology		thermodynamic modelling of geological phase equilibria	https://hpxeosandthermocalc.org		https://scholar.google.com.au/citations?user=hq9DnaAAAAAJ&hl=en&oi=ao	Twitter	@Green_UoMEarth				YES	YES	YES	YES	YES	YES	YES
Elisa	Bayraktarov	e.bayraktarov@uq.edu.au	Postdoctoral Research Fellow	The University of Queensland	Academia	Centre for Biodiversity and Conservation Science	Australia	Brisbane	Queensland	Conservation	Marine science	Data analytics	marine coastal restoration, threatened species index, species population trends	https://tsx.org.au/		https://scholar.google.com/citations?user=KnhRFbQAAAAJ&hl=de	Twitter	@ElisaBayra	Twitter	@ElisaBayra	YES	YES	YES	YES	YES			YES	YES	YES
Elizabeth	Keller	l.keller@gns.cri.nz	Data Scientist / Modeller	GNS Science	Government	National Isotope Centre	New Zealand	Lower Hutt	I am not in the U.S. or Canada	Climate change	Data analytics	Biogeochemistry	Modelling and data science to study climate change, including modelling the carbon cycle in marine and terrestrial ecosystems and paleoclimate	http://www.gns.cri.nz/who/staff/2393.html							YES	YES	YES		YES	YES
Elizabeth	Dowding	dowdingem@gmail.com	PhD candidate	UNSW	Academia	School of Biological Earth and Environmental Sciences	Australia	Randwick	NSW	Palaeontology	Tectonics	Palaeoenvironments	Bigeography	http://www.pangea.unsw.edu.au/people/students/elizabeth-dowding	https://www.researchgate.net/profile/Elizabeth_Dowding	https://scholar.google.com/citations?user=ZLcOfU8AAAAJ&hl=en&oi=ao	LinkedIn	Elizabeth Dowding			YES	YES	YES	YES	YES	YES		YES	YES	YES		YES	Outreach to schools
Ellen	Moon	ellen.moon@deakin.edu.au	Lecturer	Deakin University	Academia	School of Engineering	Australia	Waurn Ponds	Victoria	Geochemistry	Minerals industry	Geomicrobiology	Surface complexation, X-ray absorption spectroscopy, heavy metals	https://www.deakin.edu.au/about-deakin/people/ellen-moon	https://www.linkedin.com/in/ellen-moon-92b06237/?originalSubdomain=au	https://scholar.google.com.au/citations?user=23TF560AAAAJ&hl=en	Twitter	@geochemista				YES	YES	YES	YES		YES	YES	YES	YES
Emily	Flower	emily.flower@griffithuni.edu.au	PhD Candidate	Griffith University	Academia	School of Environment and Science, Environmental Futures Research Institute (EFRI)	Australia	Brisbane	QLD	Conservation	Social science	Ecology	Wildlife tourism, conservation, animal welfare, Asian elephants.			https://scholar.google.com/citations?user=kMSHzOsAAAAJ&hl=en	LinkedIn	Emily Flower			YES	YES	YES	YES	YES	YES	YES	YES	YES	YES
Emily	Warren-Smith	e.warren-smith@gns.cri.nz	Seismologist	GNS Science		Seismology	New Zealand	Lower Hutt	North Island				Seismology									YES	YES			YES	YES
Emma	Sharp	el.sharp@auckland.ac.nz	Professional Teaching Fellow	University of Auckland	Academia	School of Environment	New Zealand	Auckland	Auckland	Social science	Agriculture	Sustainability	alternative food initiatives, care, diverse economies	https://unidirectory.auckland.ac.nz/profile/el-sharp		https://scholar.google.co.nz/citations?user=zCmECO8AAAAJ&hl=en							YES		YES	YES	YES	YES				YES
Emma	Gagen	e.gagen@uq.edu.au	Research fellow	University of Queensland	Academia	School of Earth and Environmental Sciences	Australia	Brisbane	Queensland	Geomicrobiology	Biogeochemistry	Land remediation	Iron ore, canga, topsoil, mine rehabilitation	https://researchers.uq.edu.au/researcher/1244		https://scholar.google.com.au/citations?user=_2HKLM0AAAAJ&hl=en	Twitter	@EmmaJGagen			YES		YES		YES			YES	YES				Collaborations and research discussions
Emma	Ryan	e.ryan@auckland.ac.nz	Research Fellow	The University of Auckland	Academia	School of Environment	New Zealand	Auckland		Coastal Geomorphology	Palaeoenvironments	Natural hazards	coral reef, coastal adaptation	https://unidirectory.auckland.ac.nz/profile/e-ryan		https://scholar.google.co.nz/citations?user=KeD2XAoAAAAJ&hl=en&oi=sra					YES	YES	YES	YES	YES	YES	YES	YES	YES	YES
Erica	Barlow	e.barlow@student.unsw.edu.au	PhD candidate	University of New South Wales	Academia	Australian Centre for Astrobiology	Australia	Sydney	NSW	Archean geology and early Earth	Palaeontology	Palaeoenvironments	geobiology, astrobiology, early life, stromatolite, microfossil, Great Oxidation Event, GOE	https://www.bees.unsw.edu.au/erica-barlow	www.erica-barlow.com	https://scholar.google.com.au/citations?user=NuO7XBkAAAAJ&hl=en					YES	YES	YES	YES	YES	YES	YES	YES	YES	YES
Erlania		eerlania@deakin.edu.au	PhD Candidate	Deakin University	Academia	School of Life and Environmental Science	Australia	Warrnambool	AU	Marine science	Environmental management	Climate change	seaweed carbon sequestration, seaweed biomarkers, seaweed aquaculture	https://www.bluecarbonlab.org/lab-members/erlania/		https://scholar.google.co.id/citations?user=DA3D-RkAAAAJ&hl=en	LinkedIn	https://www.linkedin.com/in/erlania-erlania-53424748/	Twitter	Twitter: https://twitter.com/Erlania_Ellyn	YES	YES	YES	YES	YES	YES	YES	YES	YES	YES			Cooperative Research Work
Eva	Kovacs	e.kovacs@uq.edu.au	Postdoctoral Research Fellow	University of Queensland	Academia	Remote Sensing Research Centre, School of Earth and Environmental Sciences	Australia	St Lucia	Queensland	Remote sensing	Marine science	Biology	Coral reef, seagrass, habitat mapping, field work, gemorphology, benthos,	https://www.rsrc.org.au/		www.linkedin.com/in/eva-kovacs-13a9969	Twitter	@BreezyByTheBay			YES	YES	YES	YES	YES	YES		YES	YES	YES			field work
Evelyn	Mervine	Evelyn.Mervine@angloamerican.com	Senior Project Geoscientist	Anglo American	Industry	Group Discovery and Geosciences	Australia	Brisbane	QLD	Mining industry	Geochemistry	Climate change	mineral exploration, carbon storage, baseline environmental studies, geochronology, copper, diamonds, gold, platinum group elements, marine geology, placer geology, Mt. Isa geology	https://www.linkedin.com/in/evelyn-mervine-92840360/		https://www.researchgate.net/profile/Evelyn_Mervine					YES	YES	YES	YES	YES	YES	YES	YES	YES	YES	YES	YES
FIORELLA YESENIA	QUIÑONEZ COLLAS	fcollas.29@gmail.com	ENVIRONMENTAL ENGINEER	INAIGEM - PERU		ATMOSPHERIC SCIENCES	PERU	HUARAZ	ANCASH				CURRENTLY I AM DEVELOPING MY THESIS OF UNDERGRADUATE IN DISTRIBUTION AND SPATIALIZATION OF HEAVY METALS IN NEVADO ARTESONRAJU - CODILLERA BLANCA	http://directorio.concytec.gob.pe/appDirectorioCTI/VerDatosInvestigador.do;jsessionid=3bfca4e916ffcaa4b9ec1957dbd3?id_investigador=144279			Facebook		Facebook		YES	YES	YES	YES	YES
Francesca	Gissi	francesca.gissi@environment.nsw.gov.au	Senior scientist, ecotoxicology	Department of Planning Industry and Environment, Science Division	Government		Australia	Sydney	NSW	Contamination	Marine science	Biology	ecotoxicology, genomics, pollution, metal contaminants, mining, risk assessment	https://www.linkedin.com/in/francesca-gissi-8a01bb141/		https://scholar.google.com/citations?user=EYN4DAIAAAAJ&hl=en	Twitter	@francesca_gissi	LinkedIn	Francesca Gissi	YES	YES	YES	YES	YES	YES	YES	YES	YES	YES	YES	YES
Frederika	Mourot	f.mourot@gns.cri.nz	Scientist	GNS Science	Government	Surface Geosciences	New Zealand	Taupo		Water resources	Hydrology		Hydrogeology								YES	YES	YES	YES	YES	YES	YES	YES	YES	YES	YES	YES
Gemma	Potaka	g.potaka@gns.cri.nz	Geohazard Analyst	GNS Science	CRI	Geohazards Monitoring	New Zealand	Wellington		Natural hazards							LinkedIn	gemma-potaka			YES	YES	YES					YES	YES	YES	YES	YES
Georgette Leah	Burns	leah.burns@griffith.edu.au	Environmental Anthropologist	Griffith University	Academia	School of Environment and Sciences	Australia	Brisbane	Queensland	Social science	Environmental management	Conservation	wildlife tourism	https://experts.griffith.edu.au/academic/leah.burns							YES	YES	YES	YES	YES	YES	YES	YES	YES	YES
Georgia	Watson	georgiaw@uow.edu.au	Research assistant	University of Wollongong	Academia	School of Earth, Atmosphere and Life Sciences	Australia	Wollongong	NSW	Ecology	Biology	Conservation	invasive species				Twitter	@Georgia_0102			YES	YES	YES			YES
Gina	Swanney	gswa730@aucklanduni.ac.nz		University of Auckland	Academia	Earthscience/Geopysics	New Zealand	Auckland		Structural geology	Geophysics	Volcanology	Focused on both active and relic geothermal sites				Facebook	Gina Swanney			YES		YES		YES	YES							Opportunities for further learning within relative fields
Gloria	Senyah	gloriaaawo.senyah@hdr.qut.edu.au	Phd Student	QUT	Academia	School of earth environmental and biological sciences	Australia	Brisbane	Queensland	Geochemistry	Volcanology	Geodynamics	Paleoproterozoic Greenstone belts, lithostratigraphy, tectonic setting								YES	YES	YES	YES		YES
Graziella	Caprarelli	Graziella.Caprarelli@gmail.com	Director	Hypatia Scientifica P/L			Australia			Planetary geology	Geochemistry	GIS	Mars, convergent margins, igneous petrology, mineral thermodynamics, GPR, impact craters, water/rock interaction, stable isotopes, geostatistics	https://hypatia-scientifica.space		https://scholar.google.com.au/citations?hl=en&user=ruKvDw0AAAAJ&view_op=list_works&sortby=pubdate	LinkedIn	https://au.linkedin.com/in/graziella-caprarelli-phd-faig-173b8217			YES	YES	YES	YES	YES	YES	YES	YES	YES	YES			Scientific collaborations (topic-relevant).
Gresley	Wakelin-King	gresley@wakelinassociates.com.au	Consultant	Wakelin Associates			Australia	Melbourne	Victoria				geomorphology: fluvial geomorphology, drylands rivers, spatial science, rangelands, deserts, landscape evolution	www.wakelinassociates.com.au		www.researchgate.net/profile/Gresley_Wakelin-king	Twitter	Dr_Gres	Instagram	Gresley_desert		YES	YES		YES	YES		YES	YES	YES
Gretchen	Benedix	g.benedix@curtin.edu.au	Professor	Curtin University	Academia	School Earth and Planetary Sciences	Australia	Perth	Western Australia	Planetary geology	Geochemistry	Remote sensing	Mars, meteorites, asteroids, extraterrestrial materials	https://research.curtin.edu.au/supervisor/dr-gretchen-benedix/		https://scholar.google.com.au/citations?user=WBzGu_QAAAAJ&hl=en	LinkedIn	Gretchen Benedix	Twitter	@gbenedix		YES	YES	YES	YES	YES	YES	YES	YES	YES
Hannah	Marley	hannahmarley@outlook.co.nz	PhD student	The University of Auckland	Academia	School of Environment	New Zealand	Auckland		Atmospheric science	Climate science
Hannah	Power	hannah.power@newcastle.edu.au	Senior Lecturer in Coastal Science	University of Newcastle	Academia	School of Environmental and Life Sciences	Australia	Newcastle	NSW	Coastal Geomorphology	Oceanography	Marine science	beaches, surf, tsunami, waves, sand,	https://www.newcastle.edu.au/profile/hannah-power		https://scholar.google.com.au/citations?user=JmzQWRQAAAAJ&hl=en			Twitter	@DrHannahPower	YES	YES	YES	YES	YES	YES	YES	YES	YES	YES
Heather	Sheldon	heather.sheldon@csiro.au	Senior Research Scientist	CSIRO	Government	Mineral Resources	Australia	Canberra	ACT	Structural geology	Minerals industry	Tectonics	numerical modelling, simulation, fluid, mineralisation, geothermal, groundwater	https://people.csiro.au/S/H/Heather-Sheldon.aspx			LinkedIn	https://www.linkedin.com/in/heather-sheldon-8197a249/			YES	YES	YES	YES	YES	YES	YES	YES			YES	YES
Heather	Handley	heather.handley@mq.edu.au	Associate Professor	Macquarie University	Academia	Dept. Earth and Planetary Sciences	Australia	Sydney	NSW	Volcanology	Geochemistry	Science communication	Mineralogy, Igneous Petrology, Magmatic Processes, Women in STEM	https://researchers.mq.edu.au/en/persons/heather-handley	http://www.heatherhandley.com	https://scholar.google.com.au/citations?user=jlsRexYAAAAJ&hl=en	Twitter	@heatherkhandley			YES	YES	YES	YES	YES	YES	YES	YES	YES	YES	YES	YES
Helen	Brand	helenb@ansto.gov.au	Senior Beamline Scientist	Australian Synchrotron		Powder Diffraction	Australia	Melbourne	VIC	Planetary geology			diffraction, planetary mineralogy								YES	YES	YES	YES	YES	YES	YES	YES	YES	YES
Helen	Bostock	h.bostock@uq.edu.au	Associate Professor	University of Queensland	Academia	School of Earth and Environmental Sciences	Australia	Brisbane	Queensland	Palaeoenvironments	Oceanography	Sedimentology	Paleoceanography, Biogeochemistry, Microfossils, Climate Change	https://sees.uq.edu.au/profile/14152/helen-bostock		https://scholar.google.com/citations?hl=en&user=ZTQ3JPQAAAAJ	Twitter	@HelenBostock5	Facebook	Helen Bostock		YES	YES	YES	YES	YES	YES	YES	YES		YES
Holly	Godfrey	h.godfrey@gns.cri.nz	Exercise and Education Coordinator	GNS Science	Crown Research Institute	National Geohazards Monitoring Centre	New Zealand	Wellington		Natural hazards	Seismology	Geophysics	Geohazard monitoring			https://scholar.google.com/citations?user=WBz94L8AAAAJ&hl=en						YES	YES		YES			YES				YES
Holly	Smith	holly.smith11@griffithuni.edu.au	PhD Candidate	Griffith University	Academia	Australian Research Centre for Human Evolution	Australia	Nathan	QLD	Palaeontology	Palaeoenvironments	Geochronology	Dental morphology, taphonomy, geology, sedimentology	https://www.linkedin.com/in/hollysmith93					Twitter	Palaeophd	YES	YES	YES		YES	YES		YES	YES	YES
Hongyan	You	hongyan.you@oilsearch.com	Senior Petroleum Engineer	Oil Search Limited	Industry		Australia	Sydeny	NSW	Mining industry			Oil and Gas industry	https://www.spe.org/en/			LinkedIn				YES	YES	YES		YES
iadine	Chades	iadine.chades@csiro.au	Principal research scientist	CSIRO		Land and Water	Australia	Brisbane	QLD	Conservation	Environmental management		Artificial Intelligence, Decision theory, Conservation, Applied Ecology, Markov Decision Processes	http://www.iadine-chades.org/		https://scholar.google.com.au/citations?user=RMBx8wsAAAAJ&hl=en	Twitter	@iadinec	Instagram	@iadinechades	YES	YES	YES	YES	YES			YES	YES	YES	YES
Ilka	Wallis	ilka.wallis@flinders.edu.au	Lecturer Hydrogeology and Hydrochemistry	Flinders University	Academia	College of Science and Engineering	Australia	Adelaide	SA	Water resources	Geochemistry		hydrochemistry, water quality, reactive transport modelling, geochemical modelling, geogenic contamination	https://www.flinders.edu.au/people/ilka.wallis		https://scholar.google.com/citations?user=RYbRP2EAAAAJ&hl=en	LinkedIn	https://au.linkedin.com/in/ilka-wallis-1b0983aa					YES		YES			YES	YES	YES
Isabella	Contador-Kelsall	icck166@uowmail.edu.au	PhD Candidate	University of Wollongong	Academia	School of Earth, Atmospheric, and Life Sciences	Australia	Sydney	NSW	Biology	Ecology	Conservation	Behavioural, physiological, genetic impacts of pesticides on lizards.				Twitter	@ck_isabella			YES	YES	YES	YES	YES	YES	YES	YES	YES	YES
Isabelle	Kingsley	isabelle.kingsley@unsw.edu.au	Science communicator | Educator | PhD candidate	University of New South Wales	Academia	School of Biological, Earth and Environmental Sciences	Australia	Sydney	NSW	Science communication	Education research	Biology	science communication research, outreach research, science education research, impact evaluation, teaching and learning	https://www.bees.unsw.edu.au/isabelle-kingsley	https://www.isabellekingsley.com/	https://www.researchgate.net/profile/Isabelle_Kingsley2	Instagram	@isabellekingsley	Facebook	@isabellekingsley	YES	YES	YES	YES	YES	YES		YES	YES	YES			Contact me about anything related to research on education, teaching, learning, evaluation, outreach and science communication. I have extensive experience in communicating research to varied audiences in multiple contexts and settings. I have presented at many conferences internationally, have given talks to the general public, developed and delivered workshops for audiences from primary school …
Jackie	Webb	jackie.roslyn.webb@gmail.com	Casual academic	Southern Cross University, Charles Sturt University	Academia		Australia		NSW	Biogeochemistry	Climate science	Hydrology			https://www.researchgate.net/profile/Jackie_Webb3	https://scholar.google.com.au/citations?user=NM5ZiqgAAAAJ&hl=en	Twitter	@JackieRWebb	LinkedIn	https://www.linkedin.com/in/jackie-webb-33423938/	YES	YES	YES		YES			YES					Funding or fellowship opportunities in Australia
Jacqueline	Halpin	jacqueline.halpin@utas.edu.au	Senior Lecturer	University of Tasmania	Academia	Institute for Marine and Antarctic Studies	Australia	Hobart	TAS	Geochronology	Geochemistry	Tectonics	Antarctic geology, zircon, monazite, supercontinents, tectonic reconstructions, solid Earth-cryosphere interaction	https://www.utas.edu.au/profiles/staff/imas/jacqueline-halpin		https://scholar.google.com/citations?user=Wyfi3eUAAAAJ&hl=en&authuser=1					YES	YES	YES	YES	YES	YES	YES	YES	YES	YES
Jacqueline	Dohaney	jdohaney@swin.edu.au	Research Fellow	Swinburne University of Technology	Academia	Engineering Practice Academy	Australia	Hawthorn	Victoria	Education research	Volcanology	Natural hazards	higher education researcher, professionalisation of the geosciences, learning and teaching		https://www.researchgate.net/profile/Jacqueline_Dohaney	https://www.researchgate.net/profile/Jacqueline_Dohaney	Twitter	@jackiedohaney			YES	YES	YES	YES	YES	YES	YES	YES	YES	YES
Jan	Lindsay	j.lindsay@auckland.ac.nz	Associate Professor	The University of Auckland	Academia	School of Environment	New Zealand	Auckland	SELECT	Volcanology	Natural hazards	Geochemistry	volcanic hazard, volcanic risk, volcanic hazard maps	https://unidirectory.auckland.ac.nz/profile/j-lindsay	n/a	https://scholar.google.com/citations?user=z-0GSmoAAAAJ&hl=en	Twitter	@GeoJanUoA			YES	YES	YES	YES	YES	YES	YES	YES	YES	YES	YES
Janelle	Simpson	Janelle.simpson@dnrme.qld.gov.au	Senior Geophysicist	Geological Survey of Queensland		Minerals Geoscience	Australia	Brisbane	QLD	Geophysics			Magnetotelluric inversion, geological interpretation, potential field geophysics	https://www.linkedin.com/in/janelle-simpson-66682b43/		https://orcid.org/0000-0003-2626-3186	Twitter	@GeofizzJanelle			YES	YES	YES	YES	YES	YES	YES	YES
Jasmine	Lee	jasmine.lee@monash.edu	Postdoctoral researcher	Monash University	Academia	School of Biological Sciences	Australia	Melbourne	VIC	Conservation	Climate change	Environmental policy	Antarctic, spatial ecology, terrestrial biodiversity	http://chownlab.com/		https://scholar.google.com.au/citations?user=pUZ2nAsAAAAJ&hl=en	Twitter	jaszzyjas			YES		YES	YES	YES	YES		YES	YES	YES	YES	YES
Jen	Mitchell	Jennifer.Mitchell@monash.edu	PhD Candidate	Monash University	Academia	Dept. of Earth Atmosphere Environment	Australia	Melbourne	VIC	Planetary geology	Volcanology		Meteorite, planetary formation, Vesta, melt, melt evolution				Twitter	@ItsJenMitchell			YES	YES			YES	YES		YES	YES	YES
Jenna	Wraith	jenna.wraith@griffithuni.edu.au	PhD Candidate	Griffith University	Academia	School of Environment and Science	Australia	Gold Coast	QLD	Conservation	Climate change	Data analytics	Climate change models, species distribution models, threats, threatened species, spatial analysis, GIS, data management			https://scholar.google.com.au/citations?user=de3OZ44AAAAJ&hl=en&oi=ao	LinkedIn	https://www.linkedin.com/in/jenna-wraith-3a733013a/	Twitter	@jennalee_wraith	YES	YES	YES	YES	YES	YES		YES					Collaborations
Jennifer	Carson	jennifer@ghostmedia.com.au	Owner	Ghost Media	Editing and copy writing service		Australia	Perth	Western Australia	Soil science	Agriculture	Sustainability	tertiary education, writing workshops, technical editing	www.ghostmedia.com.au	https://www.linkedin.com/in/jennifer-carson-82ba5472/	https://scholar.google.com/citations?user=1gk-_W0AAAAJ&hl=en					YES				YES			YES				YES
Jennifer	Cooling	j.cooling@uq.edu.au	PhD Candidate	University of Queensland	Academia	School of Earth and Environmental Sciences	Australia	Brisbane	QLD	Palaeontology	Sedimentology	Palaeoenvironments	palynology, palaeoclimates, stratigraphy, biostratigraphy, taxonomy	https://www.researchgate.net/profile/Jennifer_Cooling		https://orcid.org/0000-0002-2559-9035	Twitter	palynojen			YES	YES	YES	YES	YES	YES		YES	YES	YES
Jennifer	Gadd	Jennifer.Gadd@niwa.co.nz	Aquatic Chemist	NIWA		Urban aquatic environments, Freshwater and Estuaries Centre	New Zealand	Auckland		Water resources	Contamination		Urban runoff; water quality; stormwater; Ecotoxicologist; water quality guidelines	niwa.co.nz		https://scholar.google.com/citations?user=9ogxvlkAAAAJ&hl=en	Twitter	@jennigadd			YES	YES	YES	YES	YES	YES	YES	YES	YES	YES
Jennifer	Wurtzel	jennifer.wurtzel@dpi.nsw.gov.au	Research Officer	NSW Department of Primary Industries		Climate Branch	Australia	Orange	NSW	Climate science	Drought studies	Palaeoenvironments		edis.dpi.nsw.gov.au		https://scholar.google.com/citations?user=Km3u1FkAAAAJ&hl=en	Twitter	@jwurtzel			YES	YES	YES		YES	YES		YES			YES
Jenny	Fisher	jennyf@uow.edu.au	Senior Lecturer	University of Wollongong	Academia	Centre for Atmospheric Chemistry	Australia	Wollongong	NSW	Atmospheric science	Biogeochemistry		atmospheric chemistry, mercury biogeochemistry, chemical transport models	https://scholars.uow.edu.au/display/jenny_fisher	https://documents.uow.edu.au/~jennyf/	https://scholars.uow.edu.au/display/jenny_fisher	Twitter	@AtmosJennyF				YES	YES	YES	YES	YES	YES	YES	YES	YES	YES		Women in science issues
Jess	Hillman	jithillman@gmail.com	Geologist/Geophysicist	GNS Science		Land and Marine Geoscience	New Zealand	Wellington	Wellington	Geophysics	Marine science		Gas hydrate, marine geology	https://www.gns.cri.nz/who/staff/3801.html		https://scholar.google.co.nz/citations?user=tHE56bAAAAAJ&hl=en	Twitter	@hillman_jess			YES	YES	YES	YES	YES	YES	YES	YES
Jessica	Walsh	Jessica.Walsh@monash.edu	Lecturer	Monash University	Academia	School of Biological Sciences	Australia	Melbourne	Victoria	Conservation	Environmental management	Ecology	Evidence based conservation, cost-effectiveness, woodland birds, prioritization, threatened species recovery, ecosystems recovery	Www.monash.edu.au/science/schools/biological-Sciences/staff/Jessica-walsh	http://jessicawalshconservation.com/	Scholar.google.com/citations?user=ID-zTvQAAAAJ&hl=en	Twitter	Jessicawalsh1			YES	YES	YES	YES	YES	YES	YES	YES	YES	YES	YES	YES
Jessica	Stromberg	jessica.stromberg@csiro.au	Research Scientist	CSIRO	Government	Mineral Resources	Australia	Perth	WA	Minerals industry	Geochemistry	Mining industry	Ore deposit geochemistry, hyperspectral mineralogy	https://people.csiro.au/s/j/jessica-stromberg	https://www.linkedin.com/in/jstromb/	http://orcid.org/0000-0002-7412-3535	LinkedIn	jstromb	Instagram	jstromberg	YES	YES	YES	YES	YES	YES	YES	YES	YES	YES	YES	YES
Jessica	Hamilton	hamiltoj@ansto.gov.au	Beamline Scientist (XAS)	Australian Synchrotron			Australia	Melbourne	Victoria	Geochemistry	Trace element geochemistry	Mining industry	Environmental mineralogy, mineral carbonation, mine tailings, remediation	https://www.ansto.gov.au/people/dr-jessica-hamilton		https://scholar.google.com/citations?user=hpBKHT8AAAAJ&hl=en&citsig=AMD79oo__Qncu0kSgBDQhjKtW_kAwW1J0A	Twitter	@GeoloJess_			YES	YES	YES	YES	YES	YES	YES	YES
Jessica	Walsh	jw063@uowmail.edu.au	PhD Candidate	University of Wollongong	Academia	School of Earth, Atmospheric and Life Sciences (SEALS)	Australia	Wollongong	NSW	Tectonics	Geochronology	Structural geology	Himalaya, zircon dating, detrital geochronology				Twitter	@__JessicaWalsh			YES	YES	YES	YES	YES	YES	YES	YES	YES	YES
Joan	Esterle	j.esterle@uq.edu.au	Professor- Coal Geology	University of Queensland	Academia	School of Earth and Environmental Sciences	Australia	St Lucia	Queensland	Mining industry			coal petrology, sedimentology, geotechnical assessment	www.sees.uq.edu.au									YES			YES
Jordan	Rogers	jordan.h.rogers@gmail.com	Resource Geologist	Gold Road Resources		Mineral Exploration	Australia	Perth	Western Australia	Minerals industry	GIS								LinkedIn	https://www.linkedin.com/in/jrogersgeo/	YES	YES	YES	YES	YES	YES		YES
Josephine	Potter-Craven	jo.potter@utas.edu.au	PhD Student & Environmental Policy Officer	University of Tasmania	Academia	Discipline of Geography & Spatial Sciences	Australia	Hobart	TAS	Ecology	Conservation	Environmental management	Threatened species, butterfly, wasp, conservation, ecology, management, policy	https://www.linkedin.com/in/josephine-potter-craven-048404170/			Twitter	@butterfly_doc	LinkedIn	Josephine Potter-Craven	YES	YES	YES	YES	YES	YES		YES	YES	YES
Judit Kriszta	Szabo	judit.szabo@cdu.edu.au	adjunct	Charles Darwin University	Academia		Australia	Darwin	NT	Ecology	Conservation		ornithology, conservation biology			https://scholar.google.co.uk/citations?hl=en&user=AmGSVqkAAAAJ					YES	YES	YES	YES	YES	YES	YES
Julia	Rayment	jrayment@uow.edu.au	Research Assistant	University of Wollongong	Academia	School of Life Sciences	Australia	North Wollongong	NSW	Ecology	Biology	Climate change	Exotic perennial grasses								YES	YES			YES
Julie	Arblaster	julie.arblaster@monash.edu	Associate Professor	Monash University	Academia	School of Earth, Atmosphere and Environment	Australia	Melbourne	VIC	Atmospheric science	Climate science	Climate change	climate variability, climate models, climate extremes	https://research.monash.edu/en/persons/julie-arblaster	https://research.monash.edu/en/persons/julie-arblaster	https://scholar.google.com.au/citations?hl=en&user=goUhjtUAAAAJ&view_op=list_works&sortby=pubdate	Twitter	https://twitter.com/julie_arblaster?lang=en				YES	YES	YES	YES	YES	YES	YES	YES	YES	YES	YES
karen	Joyce	karen.joyce@jcu.edu.au	Senior Lecturer	James Cook University	Academia		Australia	Trinity Beach	Queensland	Remote sensing	GIS	Science communication	Coral reef remote sensing	www.kejoyce.com		https://scholar.google.com.au/citations?user=_vSOGX0AAAAJ&hl=en	Twitter	@kejoyce2	YouTube	kejoyce12	YES	YES	YES	YES	YES	YES	YES	YES	YES	YES		YES	Science communication, community / school engagement and outreach
Karen	Thompson	karen.thompson@niwa.co.nz	Laboratory Technician	NIWA		Chemistry and Ecotoxicology	NEW ZEALAND	Hamilton	Waikato	Biology	Contamination	Ecology	Ecotoxicology, Flow Cytometry, phycology, Freshwater mussels				Twitter	@karenthompsonnz				YES	YES	YES		YES		YES	YES	YES
Karina	Gutierrez-Jurado	karina.gutierrez@flinders.edu.au	PhD Candidate	Flinders University	Academia	College of Science and Engineering	Australia	Adelaide	SOUTH AUSTRALIA	Hydrology	Water resources	Ecology	Intermittent Rivers and Ephemeral streams, streamflow generation, water management				LinkedIn	https://www.linkedin.com/in/karinaygutierrez/			YES		YES	YES	YES							YES
Karita	Negandhi	karitaln@gmail.com		Department of Industry Planning and Environment	Government	Healthy Floodplains	Australia	Parramatta	NSW	Environmental policy	Climate science	Atmospheric science	Carbon cycling, greenhouse gas emissions, microbes, wetlands	http://linkedin.com/in/karita-parker-10911945		https://scholar.google.com.au/citations?user=mlO-LTMAAAAJ&hl=en	LinkedIn	http://linkedin.com/in/karita-parker-10911945		https://www.researchgate.net/profile/Karita_Negandhi	YES	YES	YES	YES	YES	YES	YES	YES	YES	YES	YES	YES
Karyne	Rogers	k.rogers@gns.cri.nz	Environmental Scientist	GNS Science	Government		New Zealand	Wellington		Istotope geochemistry	Water resources	Contamination	Geohealth, origin and traceability studies, chemometrics, soil surveys, drinking water security and contamination,	https://www.linkedin.com/in/karyne-rogers-480430a/		https://orcid.org/0000-0001-8464-4337			LinkedIn	https://www.linkedin.com/in/karyne-rogers-480430a/	YES	YES	YES	YES	YES	YES	YES	YES	YES	YES	YES	YES
Katarina	Miljkovic	katarina.miljkovic@curtin.edu.au	Senior research fellow	Curtin University	Academia	School of Earth and Planetary Science	Australia	Perth	WA	Planetary geology	Geodynamics	Data analytics	cratering, planetary, impact, space missions, space exploration	https://www.linkedin.com/in/katarina-miljkovic-b412132/	https://staffportal.curtin.edu.au/staff/profile/view/Katarina.Miljkovic/	https://scholar.google.com.au/citations?user=yrzip0kAAAAJ&hl=en	Twitter	SpaceKatarina	LinkedIn	https://www.linkedin.com/in/katarina-miljkovic-b412132/	YES	YES	YES	YES	YES	YES	YES	YES	YES	YES	YES		mentoring PhDs and ECRs, STEM promotion
Kate	Bromfield	kate.bromfield@elementalgroup.com	Director	Elemental Group	Industry		New Zealand	Auckland		Environmental management	Mining industry			elementalgroup.com		https://www.researchgate.net/profile/Kate_Bromfield						YES	YES	YES	YES	YES	YES	YES	YES	YES	YES	YES
Kathleen	Campbell	ka.campbell@auckland.ac.nz	Professor	University of Auckland	Academia	School of Environment	New Zealand	Auckland	Not applicable	Palaeoenvironments	Archean geology and early Earth	Palaeontology	astrobiology, carbonates, extreme environments, stable isotope geochemistry, hot springs, hydrocarbon seeps, microbial sedimentology, Mars	http://www.env.auckland.ac.nz/people/ka-campbell	A History of Stones (Blog): http://www.stonehistorian.space/	https://scholar.google.co.nz/citations?user=mvh_x3QAAAAJ&hl=en	Facebook	Professor Kathleen A. Campbell			YES	YES	YES	YES	YES			YES	YES	YES	YES	YES	Astrobiology summer/winter schools, field trip leader (e.g. Rotorua/Taupo hot springs)
Kathryn	Fitzsimmons	k.fitzsimmons@mpic.de	Group Leader	Max Planck Institute for Chemistry		Research Group for Terrestrial Palaeoclimates	Germany	Mainz	Rheinland-Pfalz	Palaeoenvironments	Geochronology	Climate change	Quaternary geology, luminescence dating, aeolian environments, drought, arid zone	https://www.mpic.de/forschung/weitere-forschungsgruppen/gruppe-fitzsimmons/profile-kathryn-e-fitzsimmons.html	https://www.researchgate.net/profile/Kathryn_Fitzsimmons	https://scholar.google.de/citations?hl=en&user=-sqUAeMAAAAJ						YES	YES		YES	YES	YES	YES	YES	YES
Katie	Jones	katie.jones@gns.cri.nz	Remote Sensing Geologist	GNS Science	CRI		New Zealand	Lower Hutt	Wellington	Remote sensing	Natural hazards	GIS	Landslides, Geomorphology, Sediment Cascades			https://scholar.google.com/citations?user=h6MGO8stpcoC&hl=en						YES	YES	YES	YES	YES						YES
Katy	Evans	k.evans@curtin.edu.au	Associate Professor	Curtin University	Academia	School of Earth and Planetary Sciences	Australia	Perth and Albany	WA	Geochemistry	Ecology	Minerals industry	redox	https://staffportal.curtin.edu.au/staff/profile/view/K.Evans/		https://staffportal.curtin.edu.au/staff/profile/view/K.Evans/						YES	YES		YES		YES	YES	YES	YES
Kelly-Anne	Lawler	kelly-anne.lawler@anu.edu.au	PhD Candidate	The Australian National University	Academia	Research School of Earth Sciences	Australia	Canberra	ACT	Palaeoenvironments	Marine science	Palaeontology	Marine micropalaentology - siliceous microplankton - Antarctica	https://sopallab.home.blog/lab-members/kelly-anne-lawler/		https://www.researchgate.net/profile/Kelly_Anne_Lawler	Twitter	@sci_kel			YES	YES	YES	YES				YES
Kerrylee	Rogers	kerrylee@uow.edu.au	Associate Professor	University of Wollongong	Academia	School of Earth, Atmospheric and Life Sciences	Australia	Wollongong	NSW	Coastal Geomorphology	Geodynamics	Sedimentology	Coastal Wetlands, GI, mangrove, saltmarsh, sea-level rise	https://scholars.uow.edu.au/display/kerrylee_rogers	KerryleeRogers.com	https://scholar.google.com.au/citations?user=oOkPM3YAAAAJ&hl=en	Twitter	@KerryleeRogers_			YES	YES	YES	YES	YES	YES	YES	YES	YES	YES
Kimberley	Reid	kimberleyr@student.unimelb.edu.au	PhD Researcher	University of Melbourne	Academia	School of Earth Sciences	Australia			Climate science	Atmospheric science	Climate change	Atmospheric Rivers, Rainfall Drivers			https://scholar.google.com.au/citations?user=JFUeifcAAAAJ&hl=en	Twitter	@CaptainKim95							YES	YES		YES	YES	YES
Kit	Prendergast	kit.prendergast@postgrad.curtin.edu.au	PhD researcher	Curtin University	Academia	Molecular and Life Sciences	Australia	Wilson	WA	Conservation	Ecology	Biology	native bee, entomology, melittology, apidology, pollination biology	https://www.facebook.com/groups/Beesintheburbs/	https://twitter.com/BeeBabette	https://orcid.org/0000-0002-1164-6099	Twitter	BeeBabette	Twitter		YES	YES	YES	YES	YES	YES	YES	YES	YES	YES			Consultancy
Kris	French	kris@uow.edu.au	Prof	Uni of Wollongong	Academia	School of Earth, Atmospheric and Life Sciences	Australia	Wollongong	NSW	Ecology	Biology	Conservation	weeds, threatened species, urban, forests	https://scholars.uow.edu.au/display/kris_french		https://scholar.google.com.au/citations?user=EHWpo0IAAAAJ&hl=en&authuser=1					YES	YES	YES		YES	YES	YES	YES	YES	YES
Lara	Clarke	l.clarke@gns.cri.nz	Planner	GNS	Crown Research Institute	social science	new zealand	auckland		Climate change	Natural hazards	Water resources									YES	YES	YES	YES	YES	YES					YES	YES
Laura M.	Otter	laura.otter@mq.edu.au	PhD student/Research Associate	Macquarie University	Academia	Department of Earth and Environmental Sciences	Australia	Sydney	NSW	Biogeochemistry		Geochemistry	biomineralization, shells, microstructure, pearl, pearling industrie, gemmology, calcification	https://www.researchgate.net/profile/Laura_Otter		https://scholar.google.com.au/citations?user=AMeNbrwAAAAJ&hl=de	Twitter	@Laura_M_Otter	Facebook	acebook.com/LauraMeretOtter	YES	YES	YES	YES		YES		YES			YES	YES	women in STEM with disability
Lauren	O'Brien	obrlsoilau@gmail.com		Queensland Government	Government		Australia	Brisbane	Queensland	Soil science	GIS	Data management	acid sulfate soils, digital soils mapping, pedology				Twitter	obrl_soil			YES	YES	YES	YES	YES	YES		YES
Laurie	Chisholm	lauriec@uow.edu.au	Associate Professor	University of Wollongong	Academia	School of Earth, Atmospheric and Life Sciences	Australia	Wollongong	NSW	Remote sensing	Ecology	Environmental management	hyperspectral remote sensing, plant physiology, forest heath, forest stress, optical spectroscopy, innovative curriculum design	https://scholars.uow.edu.au/display/laurie_chisholm			Twitter	@AProfLaurieChisholm				YES	YES	YES	YES	YES		YES					collaborations
Lesley	Wyborn	lesley.wyborn@anu.edu.au	Adjunct Fellow, Senior Data Strategist	Australian National University, Australian Research Data Commons		National Computational Infrastructure, Reserach School of Earth Sciences	Australia	Canberra	ACT	Geochemistry	Geoinformatics	Minerals industry		http://nci.org.au/		https://www.researchgate.net/profile/Lai_Wyborn
Leslie	Roberson	l.roberson@uq.edu.au	Phd candidate	University of Queensland	Academia	School of Earth and Environmental Science	Australia	St Lucia	Queensland	Conservation	Marine science	Ecology	fisheries management, bycatch, seafood, supply chains, threatened species	https://www.greenfirescience.com/leslie-roberson	NA	https://scholar.google.com/citations?user=HD67S74AAAAJ&hl=en	Twitter	leslieamlwch			YES	YES	YES		YES	YES		YES	YES	YES
Letitia	Sabburg	letitia.sabburg@uqconnect.edu.au	Geospatial Analyst	UQ	Academia		Australia	Brisbane	QLD	GIS	Hydrology	Data analytics					LinkedIn	Letitia Sabburg			YES	YES	YES		YES
Lili	Yu	lyu@uow.edu.au	Technical Officer	University of Wollongong	Academia	School of Earth, Atmospheric and Life Science	Australia	Wollongong	NSW	Geochemistry	Trace element geochemistry	Atmospheric science					LinkedIn		LinkedIn		YES	YES	YES	YES
Liz	Fulton	liz.fulton@cardno.com.au	GIS Manager	Cardno Holding Pty Ltd			Australia	Wollongong	NSW	GIS	Data analytics	Data management					LinkedIn	lizzfulton				YES	YES	YES	YES
Lorna	Strachan	l.strachan@auckland.ac.nz	Senior Lecturer	University of Auckland	Academia	School of Environment, Earthscience	New Zealand	Auckland	Auckland	Sedimentology	Marine science	Natural hazards	Sedimentary processes on submarine slopes, turbidity currents, debris flows, slumps, slides	https://unidirectory.auckland.ac.nz/profile/l-strachan		http://aucklanduni.academia.edu/LornaStrachan	Twitter	@NZSeds				YES	YES	YES	YES			YES	YES	YES
Louise	Witherow	louise.witherow1@gmail.com	Student	Monash University	Academia	School of Earth Sciences	Australia	Melbourne	VIC	Environmental management	Climate science	Sustainability					LinkedIn				YES	YES	YES	YES
Lucy	Stewart	L.Stewart@gns.cri.nz	Marine Microbiologist	GNS Science	Government	Hydrothermal Systems and Minerals	New Zealand	Wellington	Wellington	Geomicrobiology	Biogeochemistry		Marine microbiology, methane cycling, extremophiles, microbial ecology	https://www.gns.cri.nz/who/staff/4340.html		https://scholar.google.com/citations?user=13rpVovDCRMC&hl=en	Twitter	lcsnz	LinkedIn	lucy-stewart-2bb6422a	YES	YES	YES		YES	YES		YES	YES	YES	YES	YES
Ludmila	Adam	l.adam@auckland.ac.nz	Senior Lecturer	University of Auckland	Academia	School of Environment	New Zealand	Auckland		Geophysics	Seismology	Volcanology	experimental volcanic and fault processes, geoscience outreach to schools, geological sequestration of carbon dioxide	http://www.env.auckland.ac.nz/people/m-adam	https://poro.blogs.auckland.ac.nz/	https://scholar.google.com/citations?user=ktewaPIAAAAJ&hl=en&authuser=1						YES	YES	YES	YES	YES		YES	YES	YES		YES
Lynda	Petherick	lynda.petherick@vuw.ac.nz	Senior Lecturer in Environmental Science	Victoria University of Wellington	Academia	School of Geography, Environment & Earth Sciences	New Zealand	Wellington		Palaeoenvironments	Climate science		Quaternary science	https://www.victoria.ac.nz/sgees/about/staff/lynda-petherick		https://scholar.google.co.nz/citations?user=cSy3AlkAAAAJ&hl=en	Twitter	@lyndapetherick			YES	YES	YES	YES	YES	YES	YES	YES	YES	YES
Madhavi A.	Patterson	madhavi.patterson@sydney.edu.au	PhD Student	The University of Sydney	Academia	Geocoastal Research Group, School of Geosciences	Australia	Sydney	NSW	Marine science	Coastal Geomorphology	Geomicrobiology	coral reefs, Pleistocene, Great Barrier Reef, Bioerosion, fossil reefs, one tree reef, last interglacial, Lizard Island, Microbioerosion, Macrobioerosion, coral assemblages, reef growth	https://grgusyd.org/people/madhavi-patterson/		https://orcid.org/0000-0003-3536-3525					YES	YES	YES	YES	YES	YES		YES	YES	YES
Mahdiyeh	Razeghi	c3242712@uon.edu.au	PhD student	University of Newcastle	Academia	Faculty of Engineering and Built Environment	Australia	Newcastle	NSW	Geophysics	Remote sensing	Tectonics	GPS - GRACE - Gravity - GNSS	http://linkedin.com/in/mahdiyeh-razeghi-05a36748		https://www.google.com/amp/s/www.researchgate.net/profile/Mahdiyeh_Razeghi/amp	Twitter	MahdiyehGeo	LinkedIn	http://linkedin.com/in/mahdiyeh-razeghi-05a36748	YES	YES	YES	YES	YES	YES	YES
Mandy	Todd	mandy.todd@griffith.edu.au	Senior Technical Officer	Griffith University	Academia	Environmental Futures Research Institute	Australia	Nathan	QLD	Ecology	Environmental management		Flying fox, bird, human-wildlife conflict	https://www.mccallum-disease-ecology.com/mandy-todd	https://au.linkedin.com/in/mandy-todd-1211894b						YES	YES	YES	YES	YES	YES	YES	YES	YES	YES
Margaret	Shanafield	margaret.shanafield@flinders.edu.au	Senior Researcher	Flinders University	Academia	College of Science and Engineering	Australia	Adelaide	SA	Hydrology	Water resources		Surface water groundwater interactions, intermittent rivers, stream dynamics, water energy food nexus	http://www.flinders.edu.au/people/margaret.shanafield	www.surfacewatergroundwater.com	https://scholar.google.com.au/citations?user=nkh8aTUAAAAJ&hl=en&oi=ao	Twitter	@shanagland	LinkedIn	margaret-shanafield	YES	YES	YES	YES	YES	YES		YES	YES	YES
Margot	Bador	m.bador@unsw.edu.au	Research Associate	CLEX / Climate Chance Research Centre at the University of New South Wales			Australia	Sydney	NSW	Climate science			climate extremes and climate change			https://scholar.google.com/citations?user=QZ6QvSgAAAAJ&hl=fr					YES	YES	YES	YES	YES
Mariam	Darestani	M.darestani@westernsydney.edu.au	Senior Lecturer	Western Sydney University	Academia	School of enginenring	Australia	Sydney	NSW	Sustainability	Water resources	Agriculture	DESALINATION FOR AGRRICULTURE	https://www.westernsydney.edu.au/cie/people/visiting_academics_and_researchers/dr_mariam_darestani		https://www.linkedin.com/in/mariam-darestani-ab55224b/	LinkedIn	https://www.linkedin.com/in/mariam-darestani-ab55224b/			YES	YES	YES	YES	YES	YES	YES	YES	YES	YES			RESERACH FUNDING AND AWARDS
Marianne	Harvey	marianne.harvey@megms.com.au	Resource Geologist	Kirkland Lake Gold		NT Mining Operations	Australia	Darwin	NT	Minerals industry	Mining industry	Science communication	Geoscience communication	http://megms.com.au	http://mazza.rocks		LinkedIn	mazzathegeo	Twitter	mazzathegeo		YES	YES		YES			YES	YES	YES
Marianne	Richter	marianne.richter@monash.edu	Early Career Researcher/Outreach coordinator	Monash University	Academia	School of Earth, Atmosphere and Environment	Australia	Melbourne	Victoria	Geochemistry	Volcanology	Geochronology				https://scholar.google.com/citations?user=Dx3aByYAAAAJ&hl=en	Twitter	@maririch15			YES	YES	YES	YES	YES	YES	YES	YES	YES	YES
Marie	Helliwell	nzhelliwell@gmail.com	Geohazard Analyst	GNS Science	Crown Research Institute	GeoNet	New Zealand	Wellington		Natural hazards	Engineering geology	Data analytics	Earthquake analytics; natural hazard response; operational monitoring; tsunami response; landslide response; volcano response; earthquake response	www.geonet.org.nz			LinkedIn	Marie Helliwell			YES	YES	YES		YES	YES						YES
Marina	Costelloe	marina.costelloe@ga.gov.au	Senior Manager (Geophysicist)	Geoscience Australia		Mineral Systems Branch	Australia	Canberra	ACT	Geophysics	Minerals industry	Remote sensing	Leadership, Communication, Diversity in STEM	www.ga.gov.au			LinkedIn	@Marina Costelloe				YES	YES	YES	YES								Divsersity, STEM, Leadership and STA
Marji	Puotinen	M.Puotinen@aims.gov.au	Spatial - Ecological Data Scientist	Australian Institute of Marine Science			Australia	Perth	Western Australia	GIS	Conservation	Marine science	coral reefs tropical cyclone hurricane typhoon disturbance	https://www.aims.gov.au/our-people/dr-marji-puotinen		https://scholar.google.com.au/citations?user=ZjL_EOIAAAAJ&hl=en	Twitter	marji_puotinen	LinkedIn	https://www.linkedin.com/in/marji-puotinen-083b595/		YES	YES	YES	YES	YES	YES	YES	YES	YES
Marta	Ribo	mribog@gmail.com	Research Associate / Data processor	University of Auckland & Discovery Marine Limited		Environmental Sciences / Marine Geology	New Zealand	Auckland		Marine science	Coastal Geomorphology	Oceanography	Marine geology, sediment dynamics, geomorphology, hydrodynamics			https://scholar.google.com.au/citations?hl=es&user=hwbmqUkAAAAJ&view_op=list_works&sortby=pubdate	LinkedIn	https://www.linkedin.com/in/marta-rib%C3%B3-924a5820/			YES	YES	YES	YES	YES	YES	YES	YES	YES	YES
Marthe	Klöcking	marthe.kloecking@anu.edu.au	Postdoctoral Fellow	Australian National University	Academia	Research School of Earth Sciences	Australia	Acton	ACT	Geochemistry	Geophysics	Geodynamics	Australian volcanism, mantle melting, mantle dynamics	http://rses.anu.edu.au/people/academics/dr-marthe-kl%C3%B6cking		https://scholar.google.com.au/citations?user=BMjaMwIAAAAJ&hl=en					YES	YES	YES		YES			YES	YES	YES
Meagan	Lowe	meaganklowe@gmail.com	PhD Candidate	University of Wollongong	Academia	School of Earth, Atmospheric and Life Sciences	Australia	Wollongong	New South Wales	Coastal Geomorphology	GIS	Climate change	coral reefs, reef islands, erosion, vulnerability, climate change, sea level rise	www.linkedin.com/in/meaganlowe			Twitter	@meaganklowe			YES	YES	YES	YES	YES	YES		YES	YES
Meaghan	Jenkins	mjenkins@uow.edu.au	Research Fellow	University of Wollongong	Academia	School of Earth, Atmospheric and Life Sciences	Australia	Wollongong	NSW	Biogeochemistry	Natural hazards	Ecology	Fire Ecology, Fuel Modelling, Fire Behaviour, Forest Carbon, Carbon Cycling	https://scholars.uow.edu.au/display/meaghan_jenkins		https://scholar.google.com.au/citations?user=FMujlawAAAAJ&hl=en	LinkedIn	https://www.linkedin.com/in/meaghan-jenkins-06b03393			YES	YES	YES	YES	YES	YES	YES	YES	YES	YES
Megan		mkortink@xtra.co.nz	Masters student	Victoria University of Wellington	Academia	SGEES	New Zealand	Wellington	Upper Hutt	Geophysics	Seismology	Marine science									YES	YES
Megan	Barnes	megan.barnes@dbca.wa.gov.au	Research Scientist (Decision Support Science)	Department of Biodiversity Conservation and Attractions, Western Australia		Biodiversity and Conservation Science	Australia	Perth	WA	Ecology	Environmental policy	Conservation	Decision Science, Protected Areas, Management Effectiveness, Structured Decision Making, Risk	https://mdbarnes.wordpress.com		https://scholar.google.com.au/citations?user=9gTEP98AAAAJ&hl=en	Twitter	@ultimatemegs			YES		YES	YES	YES		YES	YES	YES	YES
Megan	Packer	megan.packer@psm.com.au	Principal Engineering Geologist	PSM			Australia	Sydney	NSW	Engineering geology			Geotechnical engineering	www.psm.com.au			LinkedIn	megan-packer-a6716153				YES	YES		YES	YES	YES	YES
Meghan	Miller	meghan.miller@anu.edu.au	associate professor	Australian National University	Academia	Research School of Earth Sciences	Australia	Acton	ACT	Seismology	Geophysics	Geodynamics	structural seismology	http://rses.anu.edu.au/people/academics/associate-professor-meghan-samantha-miller		https://scholar.google.com/citations?user=S3EGypQAAAAJ&hl=en	Twitter	@meghansmiller				YES	YES		YES			YES	YES	YES
Melanie	Kah	melanie.kah@auckland.ac.nz	Senior Lecturer	University of Auckland	Academia		New Zealand	Auckland		Contamination	Land remediation	Soil science		http://www.science.auckland.ac.nz/people/profile/melanie-kah		https://scholar.google.com/citations?user=FnQrigwAAAAJ					YES	YES	YES	YES	YES	YES	YES	YES	YES	YES	YES	YES
Melanie	Finch	melanie.finch@monash.edu	Assistant lecturer	Monash University	Academia	School of Earth, Atmosphere and Environment	Australia	Clayton	Victoria	Structural geology	Metamorphic petrology		Elle microstructures shear zones subduction melange fluid melting metasomatism	https://research.monash.edu/en/persons/melanie-finch		https://scholar.google.com.au/citations?hl=en&user=LWx0UpIAAAAJ	Instagram	melaniefinch_	Twitter	melaniefinch_	YES	YES	YES	YES	YES	YES	YES	YES	YES	YES
Michaela	Wright	michaela.wright@bhp.com	Resource Geologist	BHP	Industry	Geoscience	Australia	Adelaide	South Australia	Mining industry	Minerals industry		Resource Estimation, Mine Geology, Geostatistics	www.bhp.com								YES	YES	YES		YES						YES
Michaela	Dobson	mdob102@aucklanduni.ac.nz	PhD Candidate	University of Auckland	Academia	School of Environment	New Zealand	Auckland	Auckland	Archean geology and early Earth	Education research	Palaeoenvironments	Astrobiology, citizen science, Pilbara, hot springs, sinter, stromatolites,	https://unidirectory.auckland.ac.nz/profile/m-dobson							YES	YES	YES	YES
Micheli Duarte de Paula	Costa	micheli.costa@deakin.edu.au	Research Fellow	Deakin University	Academia	School of Life and Environmental Sciences	Australia	Melbourne/Brisbane	VIC/QLD	Marine science	Conservation	Oceanography	species distribution models, marine spatial planning, coastal conservation	http://www.bluecarbonlab.org/lab-members/micheli-duarte-de-paula-costa/	https://www.researchgate.net/profile/Micheli_Costa	https://scholar.google.com/citations?user=c3ag0gcAAAAJ&hl=en	Twitter	@dpcmicheli			YES	YES	YES	YES	YES	YES	YES	YES
Michelle	Ward	michellesarahward1@gmail.com	Research assistant and Phd Candidate	University of Queensland	Academia	Centre of Biodiversity and Conservation Science	Australia	Diamond Valley	QLD	Conservation	Biology	GIS	Threatened species recovery			https://scholar.google.com.au/citations?user=DhWgjfsAAAAJ&hl=en	Twitter	manammichelle			YES	YES	YES	YES	YES	YES		YES	YES	YES
Miriam	Muñoz-Rojas	m.munoz-rojas@unsw.edu.au	Senior Lecturer/ARC DECRA Research Fellow	UNSW Sydney	Academia	School of Biological, Earth and Environmental Sciences	Australia	Sydney	NSW	Soil science	Land remediation	Biology	Ecosystem restoration and conservation; soil carbon; soil microbial ecology; soil function; ecosystem services	https://research.unsw.edu.au/people/dr-miriam-munoz-rojas		https://scholar.google.com/citations?user=TIJGBHEAAAAJ&hl=en	Twitter	@MiriMunozRojas			YES	YES	YES	YES	YES	YES	YES	YES	YES	YES
Monique	Van Sluys	mvansluys@zoo.nsw.gov.au	Wildlife Conservation Officer	Taronga Conservation Society Australia		Conservation and Recovery Programs	Australia	Sydney	NSW	Ecology	Conservation		Management recovery programs, population dynamics	Taronga.org.au			LinkedIn	https://www.linkedin.com/in/monique-van-sluys-84b5a715/			YES	YES	YES	YES	YES		YES
Muriel	Naguit	muriel.naguit@gmail.com	Seismology & Strong Motion Specialist	GNS Science	Crown Research Institute		New Zealand			Seismology	Disaster risk	Data management				https://www.researchgate.net/profile/Muriel_Naguit					YES	YES	YES
Naomi	Tucker	naomi.tucker@uwa.edu.au	Lecturer & Early Career Researcher	The University of Western Australia	Academia	School of Earth Science	Australia	Perth	Western Australia	Metamorphic petrology	Geochronology	Archean geology and early Earth	Antarctica geology, geochronology, high-temperature metamorphism, Proterozoic Australia	https://research-repository.uwa.edu.au/en/persons/naomi-tucker			LinkedIn	https://www.linkedin.com/in/naomimtucker			YES	YES	YES	YES	YES	YES	YES	YES	YES	YES		YES	STEM outreach & STEM education activities
Natalia	Deligne	n.deligne@gns.cri.nz	Volcanic Hazard and Risk Modeller	GNS Science		Volcanology Team	New Zealand	Wellington		Volcanology	Natural hazards	Disaster risk				https://scholar.google.co.nz/citations?user=8l0dSbUAAAAJ&hl=fr&oi=ao									YES	YES		YES	YES
Natasha	Cadenhead	ncadenhead@unimelb.edu.au	Research assistant	The University of Melbourne	Academia	School of Biosciences	Australia	Melbourne	Victoria	Conservation	Ecology	Data analytics	spatial analysis, species distribution models, population viability analysis, decision making	https://ncadenheadresearch.wordpress.com/		https://scholar.google.com.au/citations?user=LfHyQ60AAAAJ&hl=en	Twitter	@tashcadenhead				YES	YES		YES	YES		YES
Nathalie	Butt	n.butt@uq.edu.au	Research Fellow	The University of Queensland	Academia	School of Biological Sciences	Australia	Brisbane	Queensland	Climate change	Conservation	Ecology	forest ecosystem dynamics, climate change impacts on species and ecosystems, biodiversity conservation planning and management	https://www.researchgate.net/profile/Nathalie_Butt		https://scholar.google.com/citations?user=a_6EOtYAAAAJ&hl=en					YES	YES					YES	YES	YES
Ngoc	Pham	pham.ngoc@sydney.edu.au	PhD Candidate	The University of Sydney	Academia	School of Geosciences	Autralia	Sydney		Social science	Conservation	Education research	Environmental behaviour change, environmental education, sense of place, environmental governance, rural geography, Island studies, environmental geography, human geography	https://www.linkedin.com/in/ngoc-pham-1a5464123/	https://www.facebook.com/bichngocee		LinkedIn	https://www.linkedin.com/in/ngoc-pham-1a5464123/	Facebook	https://www.facebook.com/bichngocee	YES	YES	YES	YES	YES	YES	YES	YES	YES	YES
Nicole	Shumway	n.shumway@uq.edu.au	PhD Candidate	The University of Queensland	Academia	School of Earth and Environmental Sciences	Australia	Brisbane	Queensland	Conservation	Marine science	Environmental management	Marine Biodiversity offsets, Marine Conservation and Restoration, No net loss	https://sees.uq.edu.au/profile/4554/nicole-shumway	https://www.greenfirescience.com/nicki-shumway	https://scholar.google.com.au/citations?user=owIm4r0AAAAJ&hl=en	Twitter	@Nicki_S			YES	YES	YES	YES	YES	YES	YES	YES	YES	YES
Payal	Bal	bal.payal@gmail.com	Research Fellow	The University of Melbourne	Academia	Quantitative and Applied Ecology Group	Australia	Melbourne	Victoria	Conservation	Data analytics	Environmental management	global models	https://www.researchgate.net/profile/Payal_Bal2		https://scholar.google.com/citations?user=RNri_C0AAAAJ&hl=en	Twitter	@payalbal			YES	YES	YES	YES	YES	YES	YES	YES	YES	YES
Penny	King	penny.king@anu.edu.au	Professor	Australian National University	Academia	Research School of Earth Sciences	Australia	Canberra	ACT	Planetary geology	Geochemistry	Volcanology	Mars, environmental mineralogy, micro-analysis, spectroscopy	http://rses.anu.edu.au/people/academics/penelope-king		http://rses.anu.edu.au/people/academics/penelope-king#acton-tabs-link--tabs-person_tabs-middle-3					YES	YES	YES	YES	YES	YES	YES	YES	YES	YES
Pragya	Bhatt	pragyabhatt@outlook.com	PhD candidate	Griffith University	Academia	School of Environment and Sciences	Australia	Southport	Queensland	Conservation	Environmental management	Ecology										YES	YES
Rachael	Pritchard-Thorsen	rapthorsen@hotmail.com		GNS Science	Crown Research Institute		New Zealand	Wellington													YES	YES	YES		YES
Rachel	Hale	rachel.hale@niwa.co.nz	Marine Ecologist	NIWA		Marine Ecology	New Zealand	Nelson		Marine science	Ecology	Biogeochemistry	Bioturbation, science communication, benthic ecology, biodiversity, climate change	rachelhalemarine.wordpress.com		https://scholar.google.co.uk/citations?hl=en&pli=1&user=Y7fGGjYAAAAJ	Twitter	@_glitterworm	Instagram	@seawormprincess	YES	YES	YES	YES	YES	YES	YES	YES	YES	YES			Any
Rachel	Popelka-Filcoff	rachel.popelkafilcoff@flinders.edu.au	Associate Professor	Flinders University	Academia	College of Science and Engineering	Australia	Adelaide	SA	Archaeological Science	Trace element geochemistry	Geochemistry	archaeological science, radio analytical chemistry, radio ecology, uranium, nuclear forensics, spectroscopy	https://www.flinders.edu.au/people/rachel.popelkafilcoff		https://scholar.google.com.au/citations?hl=en&user=a221XKEAAAAJ						YES	YES	YES	YES	YES	YES	YES	YES	YES	YES	YES
Rebecca	West	rebecca.west@unsw.edu.au	Ecologist, Wild Deserts	University of New South Wales	Academia	School of Biological, Earth and Environmental Sciences	Australia	Sydney	New South Wales	Ecology	Conservation	Environmental management	reintroduction biology, conservaion behaviour, predator naivete	https://www.bees.unsw.edu.au/rebecca-west		https://www.bees.unsw.edu.au/rebecca-west	Facebook	@WildDeserts	Instagram	@wilddeserts		YES	YES	YES	YES	YES	YES	YES	YES	YES
Rebecca	Fomanek	rebeccakformanek@gmail.com	Assistant project manager	scuba.scientist			Australia	Warilla	NSW	Marine science	GIS	Hydrology	hydrography				LinkedIn	rebecca formanek			YES	YES	YES	YES	YES			YES	YES	YES			sustainability, conservation
Rebecca	Hillyard	bechillyard@gmail.com	Field Assistant	Massey university	Academia	School of Earth and Environment	New Zealand	Palmerston North	NI	Environmental management	Engineering geology	Environmental policy									YES
Réka H	Fülöp	rfulop@uow.edu.au	Research Fellow	University of Wollongong	Academia	School of Earth, Atmospheric and Life Sciences	Australia	Wollongong	NSW	Istotope geochemistry	Geochronology		My research interests lie in the area of geomorphology, and I am particularly interested in applying a range of cosmogenic nuclide-based methods to study the interactions between surface processes, tectonics, and climate. My current focus is on quantifying surface process rates and sediment residence times in rivers using cosmogenic in situ carbon-14 (i.e., radiocarbon produced in-situ in rocks).…	https://scholars.uow.edu.au/display/reka-hajnalka_fulop		https://scholar.google.com.au/citations?user=cqPGhbgAAAAJ&hl=en					YES	YES	YES	YES		YES	YES					YES	Grant availability, high school engagement
Roberta	Carluccio	rcarluccio@student.unimelb.edu.au	PhD student	The university of Melbourne	Academia	School of Earth Science	australia	Brunswick	VIC	Geodynamics	Geophysics	Tectonics	subduction modelling	https://www.linkedin.com/in/roberta-carluccio-b08a85b3/							YES	YES	YES	YES	YES	YES		YES	YES	YES
Robyn	Schofield	robyn.schofield@unimelb.edu.au	Director of Environmental Science Hub	University of Melbourne	Academia	School of Earth Sciences	Australia	Parkville	VIC	Atmospheric science	Climate science	Environmental management	Atmospheric chemistry, ozone, air quality	https://airbox.earthsci.unimelb.edu.au/		https://publons.com/researcher/1754078/robyn-schofield	Twitter	@RobynSchofield3	LinkedIn	https://www.linkedin.com/in/robyn-schofield-5229a853/		YES	YES		YES		YES	YES	YES	YES	YES	YES	Panel discussions
Robyn	Gardner	robyn.gardner@mq.edu.au	retired researcher	Macquarie University	Academia	Earth and Planetary Science	Australia	Sydney	NSW	Structural geology			shear zone, modelling, petrology, microstructures, melt									YES	YES					YES
Rocio	Ponce-Reyes	r.ponce.reyes@gmail.com	Research scientist	CSIRO			Australia	Brisbane	QLD	Conservation	GIS	Sustainability	biodiversity, edible insects			https://scholar.google.com.au/citations?user=OwDFgFsAAAAJ	Twitter	@ro_ponce_r	LinkedIn	https://www.linkedin.com/in/rocio-ponce-reyes-a214ab55/	YES	YES	YES	YES	YES
Rose	Dohig	r.dohig@gns.cri.nz	Geohazard Analyst	GNS Science	Crown Research Institute	Geohazards Monitoring	New Zealand	Wellington											LinkedIn	https://www.linkedin.com/feed/	YES	YES	YES	YES	YES							YES
Rose	Cantwell	rkmcantwell@gmail.com	Labratory technician	GNS Science	Crown Research Institute		New Zealand	Wellington		Hydrology	Istotope geochemistry		Groundwater, Tritium, Stable isotopes, technician	https://www.gns.cri.nz/who/staff/3838.html							YES	YES	YES	YES	YES							YES
Rosie	B	reb106@uowmail.edu.au	Student	UOW	Academia	SEALS	Australia														YES	YES	YES
Ruth	Reef	ruth.reef@monash.edu	Senior Lecturer	Monash University	Academia	School of Earth, Atmosphere and Environment	Australia	Melbourne		Coastal Geomorphology	Oceanography	Biology	erosion, vegetation, climate change, sea level rise, mangrove									YES			YES		YES	YES	YES	YES
Sally	Potter	s.potter@gns.cri.nz	Hazard & Risk Management Researcher	GNS Science	Crown Research Institute (NZ)	Science Group	New Zealand	Lower Hutt		Social science	Natural hazards	Science communication	Early warning systems, communication, severe weather, volcanoes, earthquakes, aftershocks, landslides, Emergency mobile alerts	https://www.gns.cri.nz/who/staff/2605.html	https://www.linkedin.com/in/sally-potter-phd-57841857/	https://scholar.google.co.nz/citations?user=EJTxAuwAAAAJ&hl=en&oi=ao	Twitter	@sallyhpotter					YES		YES			YES			YES		Working groups, expert panels
Sally	Dellow	s.dellow@gns.cri.nz	Team Leader Engineering Geology	GNS Science	Government		New Zealand	Wellington		Engineering geology	Natural hazards	Disaster risk										YES	YES		YES			YES				YES
Sally	Watson	sally.watson@niwa.co.nz	Marine Geophsycist	NIWA	Crown Research Institute	Ocean Geology	New Zealand	Wellington		Geophysics	GIS	Marine science		https://www.niwa.co.nz/people/sally-watson		https://scholar.google.com/citations?user=vsAcGwoAAAAJ&hl=en	Twitter	@RockDrWatson	LinkedIn	au.linkedin.com/in/sally-watson-39aa3578	YES	YES	YES	YES	YES	YES	YES	YES	YES	YES	YES	YES
Sally	Thompson	sally.thompson@uwa.edu.au	Associate Professor	UWA	Academia	Environmental Engineering	Australia	Perth	Western Australia	Hydrology	Water resources	Ecology	Ecohydrology, drylands, nonlinear dynamics, modeling	https://research-repository.uwa.edu.au/en/persons/sally-thompson		https://scholar.google.com.au/citations?hl=en&user=U_c9NhgAAAAJ									YES			YES	YES	YES
Samantha	Grover	samantha.grover@rmit.edu.au	Lecturer	RMIT University	Academia	Applied Chemistry and Environmental Sciences	Australia	Melbourne	Victoria	Soil science	Climate change	Atmospheric science	soil carbon, peatland restoration, micrometeorology	https://www.rmit.edu.au/contact/staff-contacts/academic-staff/g/grover-dr-samantha	https://www.samanthagrover.org/	https://scholar.google.com.au/citations?user=b8935I8AAAAJ&hl=en	Twitter	@drsoilsam	LinkedIn	Samantha Grover		YES	YES	YES	YES		YES	YES	YES	YES		YES	speaking to government and policy makers, international organisations
Samantha	Clarke	samantha.clarke@sydney.edu.au	Lecturer	University of Sydney	Academia	Geocoastal Research Group	Australia	Sydney	NSW	Marine science	Education research	Engineering geology	submarine landslides, submarine landslides tsunami, tsunami, slope stability, engineering geology, landslides, marine geomorphology	http://sydney.edu.au/education-portfolio/people/samantha.clarke.php	https://sites.google.com/view/samanthaclarke/home	https://www.researchgate.net/profile/Samantha_Clarke2	LinkedIn	samanthalclarke	Twitter	@samoclarke		YES	YES		YES				YES
Sandra	Mann	sandra.mann@woodside.com.au		Woodside Energy		Geoscience Technology	Australia			Sedimentology	Tectonics	Climate change	Sedimentology and Stratigraphy, Reservoir Modelling, Climate Change, University Education								YES	YES	YES	YES	YES	YES	YES	YES			YES
Sandra	McLaren	mclarens@unimelb.edu.au	Senior Lecturer	The University of Melbourne	Academia	School of Earth Sciences	Australia	Melbourne	VIC	Tectonics	Structural geology	Geochronology	higher education			https://scholar.google.com.au/citations?user=ZzB3JuYAAAAJ&hl=en	Twitter	@sandramcgeo	Instagram	@sandramcgeo	YES	YES	YES	YES	YES	YES	YES	YES				YES	Outreach at schools, primary and secondary in both city and country locations
Sara	Morón	sarapolanco001@gmail.com	Research Fellow	The University of Melbourne /The University of Sydney	Academia	School of Earth Sciences / School of Geosciences	Australia	Melbourne/Sydney	VIC/NSW	Sedimentology	Geochronology	Water resources	surface processes, numerical modeling	https://findanexpert.unimelb.edu.au/display/person603623	https://sydney.edu.au/science/people/sara.moronpolanco.php	https://scholar.google.com.au/citations?user=eIyhUxkAAAAJ&hl=en	Twitter	@SaraMgeo				YES	YES		YES	YES	YES	YES
Sarah	Milicich	s.milicich@gns.cri.nz	Geothermal geologist	GNS Science	Government	Geothermal Science	New Zealand	Lower Hutt		Geochronology	Volcanology	Tectonics	geothermal, hydrothermal, alteration, stratigraphy	https://gns.cri.nz/		https://www.researchgate.net/profile/Sarah_Milicich					YES	YES	YES	YES	YES	YES	YES	YES	YES	YES	YES	YES
Sarah	Marshall	sarah.marshall@flinders.edu.au	PhD Student	Flinders University	Academia	National Centre for Groundwater Research and Training	Australia	Adelaide	SA	Hydrology	Mining industry	Water resources	Hydrogeology, numerical modelling, groundwater resources	https://www.linkedin.com/in/sarah-k-marshall							YES	YES	YES	YES	YES	YES	YES	YES	YES	YES	YES	YES
Sarah	Bourke	sarah.bourke@uwa.edu.au	Lecturer	University of Western Australia	Academia	School of Earth Sciences	Australia	Crawley	WA	Hydrology	Water resources	Contamination	Hydrogeology, groundwater, hydrochemistry	https://research-repository.uwa.edu.au/en/persons/sarah-bourke		https://scholar.google.com.au/citations?user=AHGMkNoAAAAJ&hl=en					YES	YES	YES	YES	YES	YES	YES	YES	YES	YES
Sarah	Gain	sarah.gain@uwa.edu.au	Research Officer	University of Western Australia	Academia	Centre for Microscopy, Characterisation And analysis	Australia	Perth	Western Australia	Geochemistry	Trace element geochemistry	Geochronology				https://research-repository.uwa.edu.au/en/persons/sarah-gain					YES	YES	YES
Sarah	Jackson	sarah.jackson@anu.edu.au	PhD Candidate	ANU		Research School of Earth Sciences	Australia	Canberra	ACT	Glaciology	Climate science	Istotope geochemistry	Ice Core Science				Twitter	kiwisarahj			YES		YES					YES	YES	YES		YES
Sarah	Kachovich	s.kachovich@uq.edu.au	Marine technician	IODP Texas A&M		Earth sciences	Australian			Palaeontology	Tectonics	Oceanography	Radiolaria, earthquakes, Himalayas, micro-CT			https://scholar.google.com.au/citations?user=v7xOs8YAAAAJ&hl=en	Twitter	@SarahKachovich			YES	YES	YES	YES	YES	YES		YES	YES	YES
Saskia	Ruttor	saskia.ruttor@gmail.com	PhD Student in Geochemistry	Monash University	Academia	EAE	Australia	Mornington	VIC	Istotope geochemistry	Volcanology	Trace element geochemistry	Ocean island basalts, mass spectrometry								YES		YES				YES	YES
Selina	Ward	selinaward@uq.edu.au	Senior Lecturer	The University of Queensland	Academia	School of Biological Sciences	Australia	Brisbane	Qld	Biology	Ecology	Climate change	coral reefs	https://researchers.uq.edu.au/researcher/848		https://researchers.uq.edu.au/researcher/848					YES	YES	YES	YES	YES	YES	YES	YES	YES	YES
Shari	Gallop	shari.gallop@waikato.ac.nz	Senior Lecturer	University of Waikato	Academia	School of Science	New Zealand	Tauranga	Bay of Plenty	Oceanography	Coastal Geomorphology	Natural hazards	coastal morphodynamics, coastal oceanography, waves, rip currents, coastal hazards, women in science	https://www.waikato.ac.nz/staff-profiles/people/sgallop		https://scholar.google.com/citations?user=RPMSp-sAAAAJ&hl=en	Twitter	https://twitter.com/DrShariGallop	LinkedIn	https://www.linkedin.com/in/shari-gallop-4987b829/?originalSubdomain=nz		YES	YES	YES	YES	YES	YES	YES	YES	YES
Sharyn	Hickey	sharyn.hickey@uwa.edu.au	Postdoctoral Research Fellow	The University of Western Australia/ Australian Institute of Marine Science			Australia	Perth	WA	Remote sensing	GIS	Marine science	Mangrove, coral reef, GIS, marine, remote sensing, marine habitat	https://research-repository.uwa.edu.au/en/persons/sharyn-hickey		https://scholar.google.com.au/citations?user=9NU5F78AAAAJ&hl=en	Twitter	@SharynHickey			YES	YES	YES	YES	YES	YES	YES	YES	YES	YES
Shyno Susan John		ssj703@uowmail.edu.au	PhD Student	University of Wollongong	Academia	School of Earth, Atmospheric and Life Sciences	Australia	Wollongong	New South Whales	Atmospheric science	Climate change	Climate science	Climate Models								YES	YES	YES	YES	YES	YES	YES	YES	YES	YES
Sian	Camp	scam936@aucklanduni.ac.nz	Masters Student	University of Auckland	Academia	School of Earth Sciences	New Zealand	Auckland		Sedimentology	Palaeoenvironments	Marine science	Turbidites, Paleoseismology, Geothermal, Primary Education								YES	YES	YES		YES			YES	YES	YES		YES
Sima	Mousavi	sima.mousavi@anu.edu.au	Dr	ANU	Academia	RSES	Australia	Canberra	ACT	Geophysics	Seismology		tomography		http://rses.anu.edu.au/people/academics/dr-sima-mousavi	https://scholar.google.com/citations?user=AOUiMtkAAAAJ&hl=en	Twitter	https://twitter.com/Sima_Mousavi			YES	YES	YES	YES
Sizah	Nawzad	sizah.nawzad@gmail.com	Research student	UNSW	Academia		Australia	Sydney	NSW	Mining industry	Geophysics										YES	YES	YES	YES	YES	YES	YES	YES	YES	YES
Sophie	Briggs	sophie.briggs@otago.ac.nz	Teaching Fellow	University of Otago	Academia	Department of Geology	New Zealand	Dunedin	Otago	Geochronology	Trace element geochemistry	Science communication	Zealandia, Alpine Schist, petrochronology, LAICPMS, zircon, monazite, garnet, outreach	https://www.otago.ac.nz/geology/staff/academic/sophie-briggs.html	https://sophiebriggs.weebly.com	https://scholar.google.co.uk/citations?user=0ca4oP8AAAAJ&hl=en	Twitter	@dr_sbriggs			YES	YES	YES	YES	YES	YES		YES	YES	YES		YES	Science communication/outreach ideas in geoscience
Stacey	Priestley	stacey.priestley@ansto.gov.au	Environmental Scientist	ANSTO		The Environment	Australia	Sydney	NSW	Geochemistry	Hydrology	Palaeoenvironments		https://www.researchgate.net/profile/Stacey_Priestley	https://www.linkedin.com/in/staceypriestley/	https://scholar.google.com.au/citations?user=CWWh9DAAAAAJ&hl=en	Twitter	StacePriestley			YES	YES	YES	YES	YES	YES	YES	YES	YES	YES
Steph	McLennan	stephanie.mclennan@ga.gov.au	Geoscientist	Geoscience Australia		National Earth & Marine Observations Branch	Australia	Canberra	ACT	Coastal Geomorphology	Palaeoenvironments	Science communication	Antarctic geoscience, geomorphology				Twitter	@StephMcLenn			Yes	Yes	Yes	Yes	Yes	Yes	Yes	Yes	Yes	Yes			Internship
Stephanie	Gardner	s.gardner@unsw.edu.au	Postdoctoral Research Associate	University of New South Wales Sydney	Academia	School of Biological, Earth and Environmental Science	Australia	Sydney	NSW	Marine science	Biology	Biogeochemistry	Tropicalisation, coral reefs, temperate reefs, microbial ecology, microbiology, physiology	https://www.bees.unsw.edu.au/steph-gardner	https://stephgardner.weebly.com/	https://scholar.google.com.au/citations?user=br1SnCwAAAAJ&hl=en	Twitter	@StephGGardner	LinkedIn	https://www.linkedin.com/in/stephggardner/	YES	YES	YES	YES	YES	YES	YES	YES	YES	YES
Susi	Woelz	susi.woelz@niwa.co.nz	Principal Technician	NIWA	Academia	Ocean Geology	New Zealand	Wellington		Marine science	Data analytics	Data management	shallow water, geophysics, seismic, ArcGIS, neotectonics								YES	YES	YES	YES	YES	YES					YES	YES
Svenja	Halfter	Svenja.Halfter@utas.edu.au	PhD student	University of Tasmania	Academia	IMAS	Australia	Hobart	Tasmania	Marine science	Climate change	Science communication	Zooplankton ecology, biogeochemistry	https://www.researchgate.net/profile/Svenja_Halfter2		https://scholar.google.com.au/citations?user=STbyB6EAAAAJ&hl=de	Twitter	@svenja_halfter			YES	YES	YES	YES	YES	YES		YES			YES	YES
Taryn	Noble	taryn.noble@utas.edu.au	Marine Geochemist	University of Tasmania	Academia	College of Science and Engineering, Institute for Marine and Antarctic Studies	Australia	Hobart	Tasmania	Trace element geochemistry	Palaeoenvironments	Marine science	Antarctic, Southern Ocean, paleoceanography	https://www.utas.edu.au/profiles/staff/imas/taryn-noble		https://scholar.google.com.au/citations?user=dy6PSWgAAAAJ&hl=en	Twitter	@NobleTaryn			YES	YES	YES	YES	YES	YES	YES	YES	YES	YES
Teresa	Ubide	t.ubide@uq.edu.au	Lecturer	The University of Queensland	Academia	School of Earth and Environmental Sciences	Australia	Brisbane	Queensland	Volcanology	Geochemistry	Trace element geochemistry	volcanoes, crystals, magmatic histories, eruption triggers, magma mixing, laser ablation, mass spectrometry, geochemical mapping, Ring of Fire	https://researchers.uq.edu.au/researcher/15355	https://scienceandtechnologyaustralia.org.au/profile/dr-teresa-ubide/	https://scholar.google.com.au/citations?user=fMXug4cAAAAJ&hl=en	Twitter	@teresaubide	LinkedIn	linkedin.com/in/teresa-ubide-a17a17183		YES	YES	YES	YES	YES	YES	YES	YES	YES
Valeria	Bianchi	valeria.bianchi2504@gmail.com	Specialist geology	UQ	Academia	School of Earth and Environmental Science	Australia			Sedimentology	Palaeoenvironments	Mining industry	Applied sedimentology, stratigraphic forward modelling, fluvial environments, coastal environments, mineral resources, oil and gas, groundwater, reservoir, active tectonics			http://scholar.google.it/citations?user=f_lWGfoAAAAJ&hl=it	LinkedIn	https://www.linkedin.com/in/valeria-bianchi-57765378/			YES	YES	YES	YES	YES	YES	YES	YES	YES	YES	YES
Vanessa	Wong	vanessa.wong@monash.edu	Senior lecturer	Monash University	Academia	School of Earth Atmosphere and Environment	Australia	Clayton	VIC	Soil science	Biogeochemistry	Environmental management	acid sulfate soils, wetlands, soil carbon, biogeochemical cycling, soil chemistry	https://research.monash.edu/en/persons/vanessa-wong		https://scholar.google.com.au/citations?hl=en&user=HCfmDzIAAAAJ	Twitter	@DrVanessaWong	LinkedIn	https://www.linkedin.com/in/vanessa-wong-soil-scientist/		YES	YES	YES	YES	YES	YES	YES	YES	YES
Verity	Normington	veritynormington@hotmail.com	Project Geologist	Northern Territory Geological Survey		Basin Geoscience	Australia	Alice Springs	Northern Territory	Sedimentology	Glaciology	Science communication	Mapping				Twitter	@VeetheRockChick	LinkedIn	VerityNormington	YES	YES	YES		YES				YES	YES
Vickie	Bennett	vickie.bennett@anu.edu.au	Professor	Australian National University	Academia	Research School of Earth Sciences	Australia	Canberra	ACT	Istotope geochemistry	Archean geology and early Earth	Planetary geology	continent formation, mantle geochemisty, Earth chemical evolution, early planet formation	http://rses.anu.edu.au/people/academics/professor-vickie-c-bennett#acton-tabs-link--tabs-person_tabs-middle-1		Googlel Scholar: https://scholar.google.com.au/citations?hl=en&user=yH5IgCMAAAAJ						YES	YES	YES	YES	YES	YES	YES
Victoria	Haynes	sharkyhaynes@gmail.com	Student	The university of sydney	Academia	Geography	Australia	Sydney	Nsw	Disaster risk	Climate change	GIS	Heatwaves, urban heat, development, planning, vulnerability, resilience								YES	YES	YES					YES	YES	YES
Weronika	Gorczyk	weronika.gorczyk@uwa.edu.au	Research Fellow	University of Western Australia	Academia	Center for Exploration Targeting, School of Earth Science	Australia	Perth	WA	Geodynamics	Tectonics	Geophysics	subduction zones, basins, numerical modeling, mantle wedge processes	http://www.cet.edu.au/who-we-are/about-us/a-z-staff-profiles/weronika-gorczyk		https://scholar.google.com.au/citations?user=Ego7SlUAAAAJ&hl=en					YES	YES	YES	YES	YES	YES	YES	YES	YES	YES
Ximena	Aguilar Vega	ximena.a.vega@gmail.com		Universidad de Magallanes	Academia	School of Antarctic Sciences	Chile	Punta Arenas		Oceanography	Glaciology	Remote sensing	Biogeochemistry, dynamics, optics, climate change, carbon pumb	https://www.researchgate.net/profile/Ximena_A_Vega2			Facebook	https://www.facebook.com/Ximena-A-Vega-2441976985844095/	Instagram	https://www.instagram.com/ximena.av/	YES	YES	YES	YES	YES	YES		YES				YES
Yi-Ling	Hwong	y.hwong@unsw.edu.au	Postdoctoral Research Associate	UNSW Climate Change Research Centre			Australia			Atmospheric science	Data analytics	Science communication	Convection, climate models, atmospheric models, clouds, convective parameterisation, machine learning, science communication, social media	https://www.ccrc.unsw.edu.au/ccrc-team/academic-research/yi-ling-hwong	http://yiling-hwong.com/	http://scholar.google.com.au/citations?user=cknbn1cAAAAJ&hl=en	Twitter	@yilinghwong			YES	YES	YES	YES	YES	YES
Yona	Nebel-Jacobsen	yona.nebel-jacobsen@monash.edu	Lab manager and research fellow	Monash University	Academia	SEAE	Australia	Melbourne	VIC	Istotope geochemistry	Geochemistry	Geochronology	radiogenic isotopes, stable isotopes, analytical geochemistry, geology, zircon, solution, wet chemistry	https://research.monash.edu/en/persons/yona-nebel-jacobsen		https://scholar.google.com.au/citations?user=L7vT9oAAAAAJ&hl=en	Twitter	@Isotope_Yona			YES	YES	YES	YES	YES			YES	YES	YES
Yvette	Poudjom Djomani	yvette.djomani@ga.gov.au	senior geophysicist	Geoscience Australia	Government	Geophysics	Australia	Canberra	ACT	Geophysics			magnetics, radiometrics, gravity	ga.gov.au			LinkedIn	https://www.linkedin.com/in/yvette-poudjom-djomani-596ab610/			YES	YES	YES	YES		YES
Zanna	Chase	zanna.chase@utas.edu.au	Associate Professor	University of Tasmania	Academia	Institute for Marine and Antarctic Studies	Australia	Hobart	Tasmania	Oceanography	Palaeoenvironments	Biogeochemistry	chemical oceanography, paleoceanography, Southern Ocean	https://www.utas.edu.au/profiles/staff/imas-qms-utas/zanna-chase		https://scholar.google.com.au/citations?user=hn4ySXEAAAAJ&hl=en	Twitter	@zanna_chase					YES		YES		YES	YES	YES	YES
																														Internship
																														Diversity, Equity, and Inclusion topics
